# Supplementary material for: Refined molecular microstructure and optimized carrier management of multicomponent organic photovoltaics toward 19.3% certified efficiency
Source: Royal Society of Chemistry journal article supplement (doi:10.1039/d3ee00630a), 2023-01-01
Supplement: d3ee00630a1.pdf [file d3ee00630a1.pdf]

Electronic Supplementary Information for

**Refined molecular microstructure and optimized carrier management of multicomponent organic photovoltaics toward 19.3% certified efficiency**

Shuixing Li,<sup>‡a</sup> Chengliang He,<sup>‡a</sup> Tianyi Chen,<sup>‡a</sup> Jiale Zheng,<sup>‡b</sup> Rui Sun,<sup>c</sup> Jin Fang,<sup>d</sup> Yiyao Chen,<sup>e</sup> Youwen Pan,<sup>a</sup> Kangrong Yan,<sup>a</sup> Chang-Zhi Li,<sup>a</sup> Minmin Shi,<sup>a</sup> Lijian Zuo,<sup>a</sup> Chang-Qi Ma,<sup>d</sup> Jie Min,<sup>c</sup> Yujing Liu<sup>\*b</sup> and Hongzheng Chen<sup>\*a</sup>

<sup>a</sup> State Key Laboratory of Silicon Materials, International Research Center for X Polymers, Department of Polymer Science and Engineering, Zhejiang University, Hangzhou 310027, P. R. China.

*Email:* [hzchen@zju.edu.cn](mailto:hzchen@zju.edu.cn)

<sup>b</sup> College of Materials Science and Engineering, Zhejiang University of Technology, Hangzhou 310014, P. R. China.

*Email:* [yujingliu@zjut.edu.cn](mailto:yujingliu@zjut.edu.cn)

<sup>c</sup> The Institute for Advanced Studies, Wuhan University, Wuhan 430072, P. R. China.

<sup>d</sup> i-Lab & Printable Electronics Research Centre, Suzhou Institute of Nano-tech and Nanobionics, Chinese Academy of Sciences, Suzhou 215123, P. R. China.

<sup>e</sup> Vacuum Interconnected Nanotech Workstation (Nano-X), Suzhou Institute of Nano-Tech and Nano-Bionics, Chinese Academy of Sciences, Suzhou 215123, P. R. China.

<sup>‡</sup> S. Li, C. He, T. Chen and J. Zheng contributed equally to this work.

## Supplementary Experimental Procedures

### Materials

Polymer donor PM6 was purchased from Solarmer Materials. The other reagents and chemicals were purchased from commercial sources and used as received. BTP-S2 (*Adv. Mater.* **2020**, *32*, 2001160) and BTP-S9 (*Nat. Commun.* **2021**, *12*, 4627) were synthesized according to our previous reported work. The detailed synthetic procedures of BTP-S11, BTP-S12 and BTP-S15 are described below.

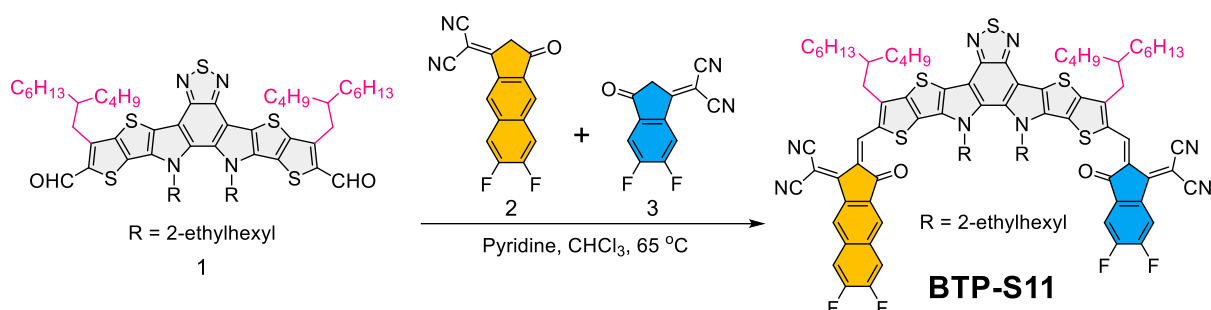

2-((Z)-2-((3,9-bis(2-butyl-1-octyl)-10-(((Z)-1-(dicyanomethylene)-5,6-difluoro-3-oxo-1,3-dihydro-2H-inden-2-ylidene)methyl)-12,13-bis(2-ethylhexyl)-12,13-dihydro-[1,2,5]thiadiazolo[3,4-e]thieno[2'',3'':4',5']thieno[2',3':4,5]pyrrolo[3,2-g]thieno[2',3':4,5]thieno[3,2-b]indol-2-yl)methylene)-6,7-difluoro-3-oxo-2,3-dihydro-1H-cyclopenta[b]naphthalen-1-ylidene)malononitrile (BTP-S11)

To a Schlenk tube were added **Compound 1** (0.4 g, 0.38 mmol), **Compound 2** (0.22 g, 0.8 mmol), **Compound 3** (0.18 g, 0.8 mmol) and CHCl<sub>3</sub> (50 mL). The mixture was frozen with liquid nitrogen, followed by three times of successive vacuum and nitrogen fill cycles. Under the protection of N<sub>2</sub>, 1 mL pyridine was injected. Then, the reactant was refluxed at 65 °C for 22 h. The crude product was purified using silica gel column chromatography with the mixture of petroleum ether and dichloromethane (1:1, v/v) as the eluent, yielding a deep brown solid (0.20 g, 34%). <sup>1</sup>H NMR (500 MHz, CDCl<sub>3</sub>): δ = 9.21 (s, 1H), 9.14 (s, 1H), 9.10 (s, 1H), 8.56 (dd, *J* = 9.9, 6.5 Hz, 1H), 8.30 (s, 1H), 7.80 (dd, *J* = 18.1, 10.3 Hz, 2H), 7.71 (t, *J* = 7.4 Hz, 1H), 4.81 (t, *J* = 7.3 Hz, 4H), 3.16 (t, *J* = 6.7 Hz, 4H), 2.17-2.03 (m, 4H), 1.52-1.43 (m, 4H), 1.41-1.34 (m, 4H), 1.32-0.92 (m, 40H), 0.89-0.75 (m, 18H), 0.71-0.63 (m, 6H). MS (MALDI-TOF): Cald for C<sub>88</sub>H<sub>92</sub>F<sub>4</sub>N<sub>8</sub>O<sub>2</sub>S<sub>5</sub> (M<sup>+</sup>): 1530.05, Found: 1530.09.

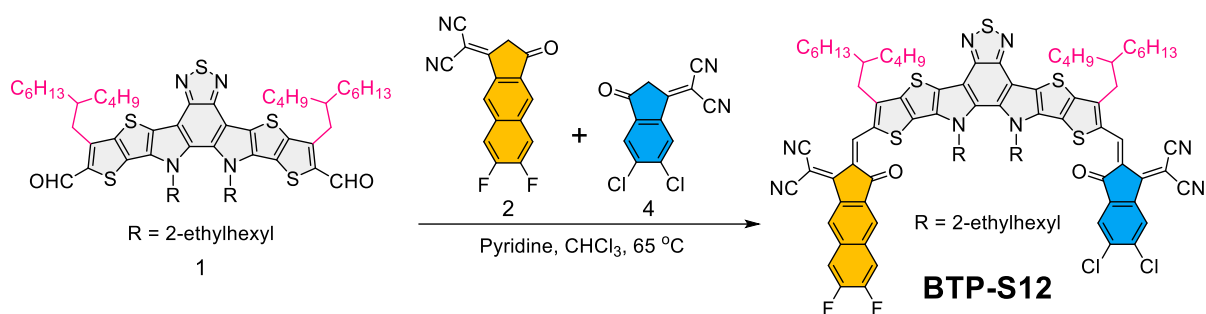

*2-((Z)-2-((3,9-bis(2-butylloctyl)-10-(((Z)-5,6-dichloro-1-(dicyanomethylene)-3-oxo-1,3-dihydro-2H-inden-2-ylidene)methyl)-12,13-bis(2-ethylhexyl)-12,13-dihydro-[1,2,5]thiadiazolo[3,4-e]thieno[2'',3'':4',5']thieno[2',3':4,5]pyrrolo[3,2-g]thieno[2',3':4,5]thieno[3,2-b]indol-2-yl)methylene)-6,7-difluoro-3-oxo-2,3-dihydro-1H-cyclopenta[b]naphthalen-1-ylidene)malononitrile (BTP-S12)*

To a Schlenk tube were added **Compound 1** (0.53 g, 0.5 mmol), **Compound 2** (0.28 g, 1 mmol), **Compound 4** (0.26 g, 1 mmol) and  $\text{CHCl}_3$  (50 mL). The mixture was frozen with liquid nitrogen, followed by three times of successive vacuum and nitrogen fill cycles. Under the protection of  $\text{N}_2$ , 1 mL pyridine was injected. Then, the reactant was refluxed at  $65^\circ\text{C}$  for 22 h. The crude product was purified using silica gel column chromatography with the mixture of petroleum ether and dichloromethane (1:1, v/v) as the eluent, yielding a deep brown solid (0.19 g, 24%).  $^1\text{H}$  NMR (500 MHz,  $\text{CDCl}_3$ ):  $\delta = 9.25$  (s, 1H), 9.17 (s, 1H), 9.13 (s, 1H), 8.80 (s, 1H), 8.33 (s, 1H), 7.98 (s, 1H), 7.87-7.78 (m, 2H), 4.79 (t,  $J = 6.8$  Hz, 4H), 3.20 (dd,  $J = 14.6, 7.8$  Hz, 4H), 2.16-2.03 (m, 4H), 1.51-1.43 (m, 4H), 1.42-1.36 (m, 4H), 1.34-0.91 (m, 40H), 0.90-0.72 (m, 18H), 0.70-0.60 (m, 6H). MS (MALDI-TOF): Calcd for  $\text{C}_{88}\text{H}_{92}\text{Cl}_2\text{F}_2\text{N}_8\text{O}_2\text{S}_5$  ( $\text{M}^+$ ): 1562.95, Found: 1562.47.

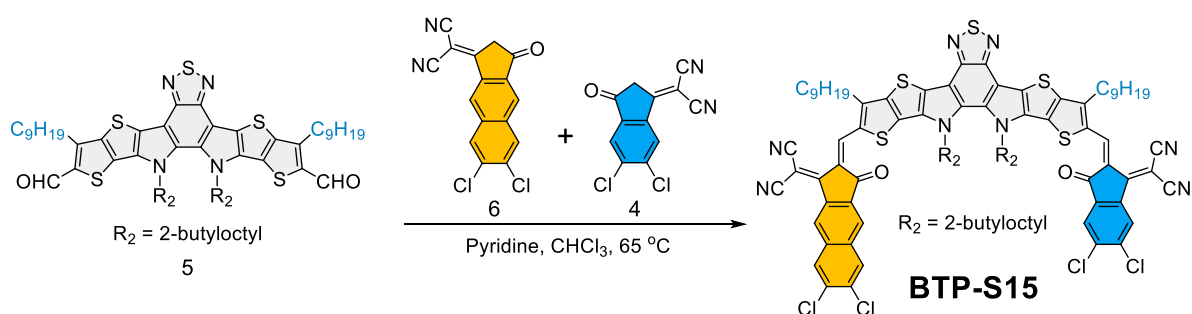

*2-((Z)-2-((12,13-bis(2-butylloctyl)-10-(((Z)-5,6-dichloro-1-(dicyanomethylene)-3-oxo-1,3-dihydro-2H-inden-2-ylidene)methyl)-3,9-dinonyl-12,13-dihydro-[1,2,5]thiadiazolo[3,4-e]thieno[2'',3'':4',5']thieno[2',3':4,5]pyrrolo[3,2-g]thieno[2',3':4,5]thieno[3,2-b]indol-2-yl)methylene)-6,7-dichloro-3-oxo-2,3-dihydro-1H-cyclopenta[b]naphthalen-1-ylidene)malononitrile (BTP-S15)*

To a Schlenk tube were added **Compound 5** (0.27 g, 0.25 mmol), **Compound 4** (0.13 g, 0.5 mmol), **Compound 6** (0.16 g, 0.5 mmol) and  $\text{CHCl}_3$  (50 mL). The mixture was frozen with liquid nitrogen, followed by three times of successive vacuum and nitrogen fill cycles. Under

the protection of N<sub>2</sub>, 0.6 mL pyridine was injected. Then, the reactant was refluxed at 65 °C for 21 h. The crude product was purified using silica gel column chromatography with the mixture of petroleum ether and dichloromethane (1:1, v/v) as the eluent, yielding a black solid (0.09 g, 22%). <sup>1</sup>H NMR (500 MHz, CDCl<sub>3</sub>): δ = 9.17 (d, *J* = 18.2 Hz, 2H), 9.03 (s, 1H), 8.77 (s, 1H), 8.25 (s, 1H), 8.16 (s, 1H), 8.11 (s, 1H), 7.96 (s, 1H), 4.89-4.74 (m, 4H), 3.27-3.11 (m, 4H), 2.22-2.12 (m, 2H), 1.92-1.80 (m, 4H), 1.54-1.47 (m, 4H), 1.42-1.33 (m, 4H), 1.32-1.21 (m, 20H), 1.16-0.84 (m, 34H), 0.74-0.65 (m, 12H). MS (MALDI-TOF): Calcd for C<sub>90</sub>H<sub>96</sub>Cl<sub>4</sub>N<sub>8</sub>O<sub>2</sub>S<sub>5</sub> (M<sup>+</sup>): 1623.91; Found: 1624.38.

---

### General characterizations

<sup>1</sup>H NMR spectra were obtained on a Bruker Advance III 500 (500 MHz) nuclear magnetic resonance (NMR) spectroscope. MALDI-TOF MS spectra were measured on a Walters Maldi Q-TOF Premier mass spectrometry. UV-vis-NIR absorption spectra were recorded on a Shimadzu UV-1800 spectrophotometer. Cyclic voltammetry (CV) was done on a CHI600A electrochemical workstation with Pt disk, Pt plate, and standard calomel electrode (SCE) as working electrode, counter electrode, and reference electrode, respectively, in a 0.1 mol/L tetrabutylammoniumhexafluorophosphate (Bu<sub>4</sub>NPF<sub>6</sub>) acetonitrile solution. The CV curves were recorded versus the potential of SCE, which was calibrated by the ferrocene-ferrocenium (Fc/Fc<sup>+</sup>) redox couple (4.8 eV below the vacuum level). The equation of  $E_{\text{LUMO/HOMO}} = -e(E_{\text{red/ox}} + 4.41)$  (eV) was used to calculate the LUMO and HOMO levels (the redox potential of Fc/Fc<sup>+</sup> is found to be 0.39 V). AFM images were obtained on a VeecoMultiMode atomic force microscopy in the tapping mode. Differential scanning calorimetry (DSC) was recorded on a Pekin-Elmer Pyris 1 differential scanning calorimeter. Ultraviolet photoelectron spectroscopy (UPS) data was conducted by an ESCALAB Xi+ system (Thermo Scientific), He I radiation (21.22 eV) with an applied bias of -10 V was used for UPS.

## **HR-TEM**

The HR-TEM was conducted by employing a transfer holder and TEM (FEI Talos-S) at 200 kV. 300 mesh Cu was used as a carrier for the film deposition. All samples were prepared via the spin-coating and annealing process for TEM imaging. At first, the prepared solution (donor: 4 mg/ml, acceptor: 6mg/ml, blend: 8.25 mg/ml) was slowly and evenly dripped onto the Cu mesh, which was placed on spin coater to make the film at the speed of 1000 rpm. Then, the corresponding samples were thermally annealed for 10 min.

## **EL**

The EL signature was collected with a monochromator and detected with an InGaAs detector. Data collection range is 700-1300 nm.

## **FTPS-EQE**

The FTPS measurements were recorded using a Bruker Vertex 70 Fourier-transform infrared (FTIR) spectrometer, equipped with a quartz tungsten halogen lamp, a quartz beam-splitter, and an external detector option. A low noise current amplifier (Femto DLPCA-200) was used to amplify the photocurrent produced on the illumination of the photovoltaic devices with light modulated by the FTIR. The output voltage of the current amplifier was fed back into the external detector port of the FTIR. The photocurrent spectrum was collected by FTIR's software.

## **EQE<sub>EL</sub>**

Electroluminescence quantum efficiency (EQE<sub>EL</sub>) measurements were performed by applying

external voltage sources through the devices from 1V to 4V. A Keithley 2400 SourceMeter was used for supplying voltages and recording injected current, and a Keithley 485 picoammeter was used for measuring the emitted light intensity.

## **GIWAXS**

GIWAXS measurements were performed in a Xeuss 3.0 SAXS/WAXS system with a wavelength of  $\lambda = 1.542 \text{ \AA}$  at Vacuum Interconnected Nanotech Workstation (Nano-X).

## **Device fabrication and measurement**

Organic photovoltaics were fabricated on glass substrates commercially pre-coated with a layer of ITO with the conventional structure of ITO/PEDOT:PSS/Active layer/Bis-FIMG/Ag. Prior to fabrication, the substrates were cleaned using detergent, deionized water, acetone and isopropanol consecutively for 15 min in each step, and then treated in an ultraviolet ozone generator for 15 min before being spin coated at 4500 rpm with a layer of 20 nm thick PEDOT:PSS (Baytron P AI4083). After baking the PEDOT:PSS layer in air at 170 °C for 20 min, the substrates were transferred to a glovebox. The active layer was formed according to the following procedure: the donor and acceptor were dissolved in chloroform solution with a total concentration of 16.5 mg/ml for all active layers, except PM6:BTP-S12, whose total concentration was 12 mg/ml due to the limited solubility of BTP-S12; the donor:acceptor weight ratio was fixed as 1:1.2 for all active layers; after heating the solution at 55 °C for 1h, the solution was cooled for 3 min and then 0.25% (v/v) DIO was added as the additive; then the solution was further heated at 55 °C for 10 min, after that, the active layer was spin-coated at

3000-3500 rpm for 25 s, except PM6:BTP-S12, whose spin-coating speed was 1800-2000 rpm for 25 s. Then an extra preannealing at 80 °C for 8 min was performed. A thin layer of Bis-FIMG was spin-coated from 1 mg/ml methanol solution at 4000 rpm for 40 s on the top of active layer. Finally, the Ag (100 nm) electrode was deposited by thermal evaporation to complete the device with an active layer of 6 mm<sup>2</sup>, as defined by the overlapping area of ITO and Ag. A mask with an area of 4.73 mm<sup>2</sup> was used to measure the efficiencies. The  $J$ - $V$  measurement was performed via the solar simulator (SS-F5-3A, Enlitech) along with AM 1.5 G spectra at 100 mW/cm<sup>2</sup>, that was calibrated by the certified standard silicon solar cell (SRC-2020, Enlitech) with KG-2 filter. Devices were tested in N<sub>2</sub>-filled glovebox. The scan direction is -0.1 to 1 V, with a scan step of 0.01 V and dwell time is 1 ms. The EQE data were obtained by using the solar-cell spectral-response measurement system (RE-R, Enlitech).

### **SCLC measurement**

The charge carrier mobilities of the blend films were measured using the space-charge-limited current method. Hole-only devices were fabricated in a structure of ITO/PEDOT:PSS/Active layer/MoO<sub>3</sub>/Ag, electron-only devices were fabricated in a structure of ITO/ZnO/Active layer/Bis-FIMG/Ag. The device characteristics were extracted by modeling the dark current under forward bias using the SCLC expression described by the Mott-Gurney law:  $J=9\varepsilon_r\varepsilon_0\mu V^2/8L^3$ , where  $\varepsilon_r \approx 3$  is the average dielectric constant of the active layer,  $\varepsilon_0$  is the permittivity of the free space,  $\mu$  is the carrier mobility,  $V$  is the applied voltage and  $L$  is the thickness of the film.

## Supplementary Figures and Notes

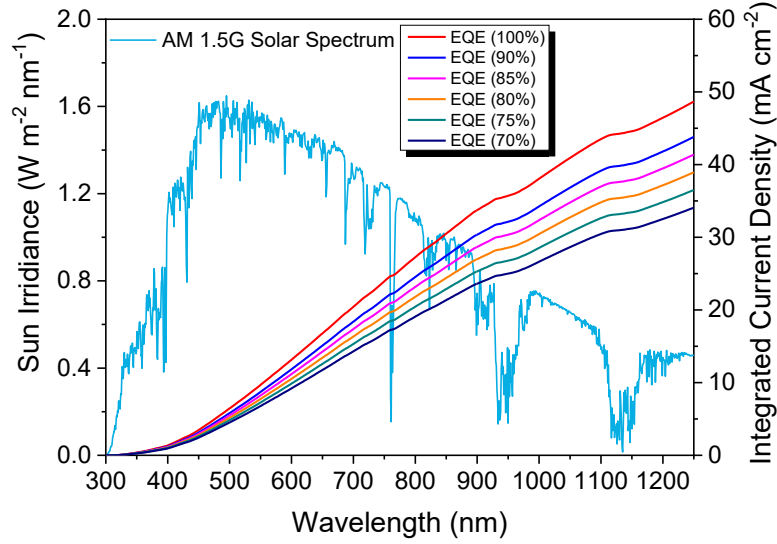

**Fig. S1** AM 1.5 G solar spectrum and integrated current density.

### Note S1: Theoretical efficiency calculation

For theoretical efficiency calculation, it's performed according to the following procedure:

Firstly, wavelength (or bandgap  $E_g$ ) and energy loss ( $E_{loss}$ ) are set as two variates, which are strongly correlated with the photovoltaic materials. The efficiency matrix figure will be formed by calculating enough single dots. Here, we set the wavelength ranging from 700 to 1000 nm and energy loss ranging from 0.6 to 0.3 eV, and 30100 single efficiency dots are calculated.

Secondly, for the calculation of single efficiency dot, voltage ( $V_{oc}$ ) is obtained via the following equation (1):

$$V_{oc} = \frac{E_g - E_{loss}}{q} \quad (1)$$

Photocurrent ( $J_{sc}$ ) is calculated via the following equation (2):



$$J_{sc} = q \cdot \int_0^{\infty} N_{\lambda}(\lambda) \cdot EQE(\lambda) d\lambda \quad (2)$$

where  $N_{\lambda}$  is the photon flux spectrum of the AM 1.5 G solar spectrum. The results of integrated current densities with various EQE values are shown in above **Fig. S1**. For fill factor (FF), we can either set it as a fixed value or use the max value calculated through the following empirical equation (3):

$$FF = \frac{\gamma_{oc} - \ln(\gamma_{oc} + 0.72)}{\gamma_{oc} + 1} \quad (3)$$

where  $\gamma_{oc}$  is the normalized  $V_{oc}$ , and can be obtained with the following equation (4):

$$\gamma_{oc} = e V_{oc} / n k T \quad (4)$$

where  $e$  is the elementary charge,  $n$  is the diode ideality factor (for high-efficiency OPVs,  $n \approx 1$ ),  $k$  is Boltzmann constant and  $T$  is the temperature.

Finally, the power conversion efficiency (PCE) for a single dot with a specific combination of wavelength and energy loss can be calculated through the following equation (5):

$$PCE = \frac{V_{oc} \times J_{sc} \times FF}{P_{in}} \quad (5)$$

where  $P_{in}$  is the input light power density of the AM 1.5 G solar light.

---

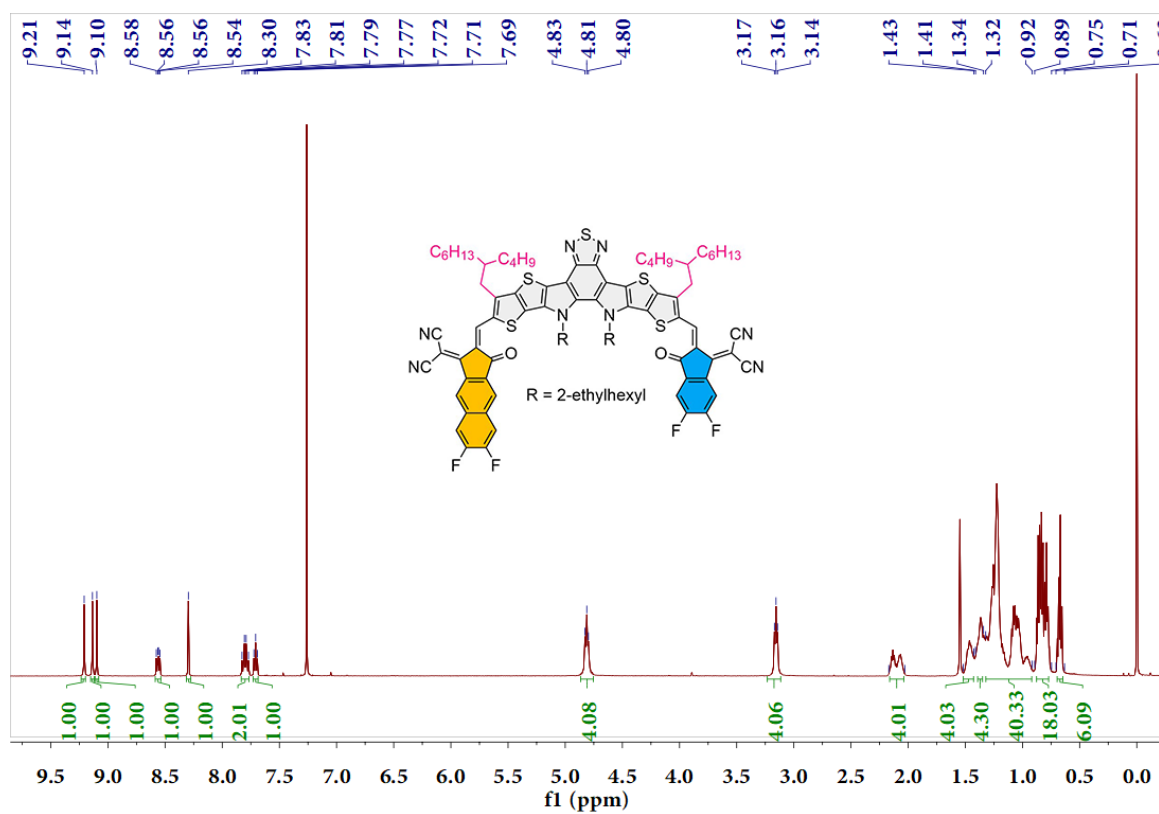

Fig. S2  $^1\text{H}$  NMR spectrum of BTP-S11.

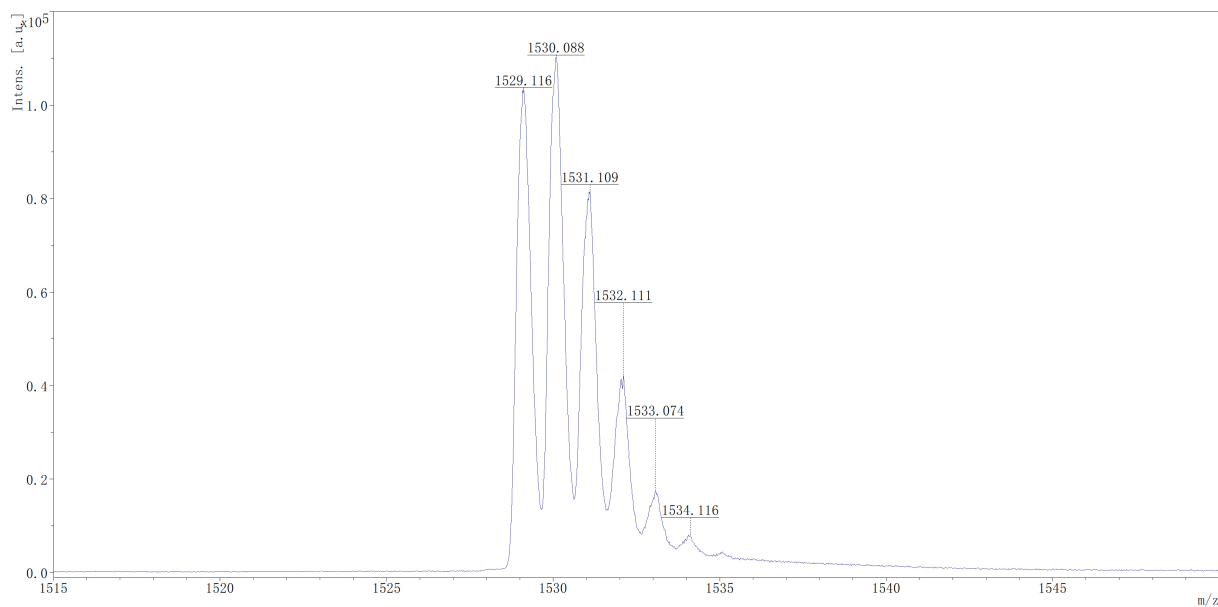

Fig. S3 MALDI-TOF mass spectrum of BTP-S11.

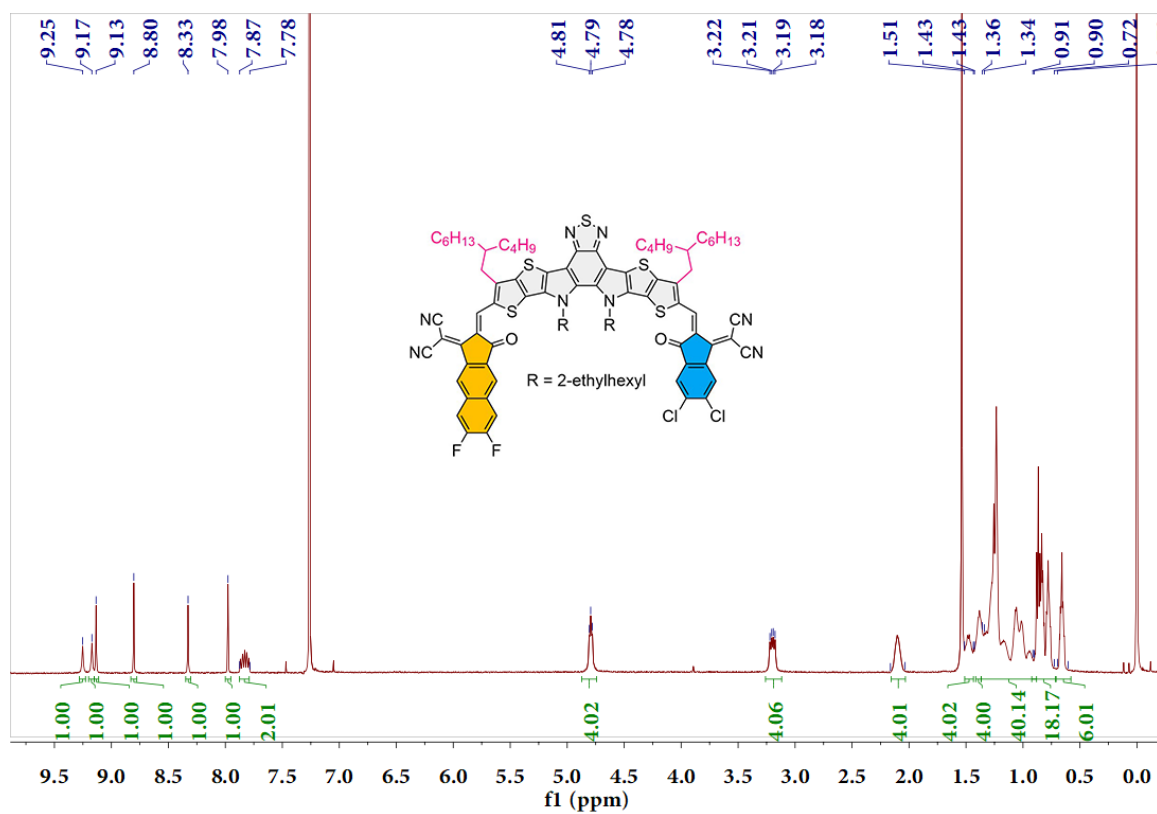

Fig. S4  $^1\text{H}$  NMR spectrum of BTP-S12.

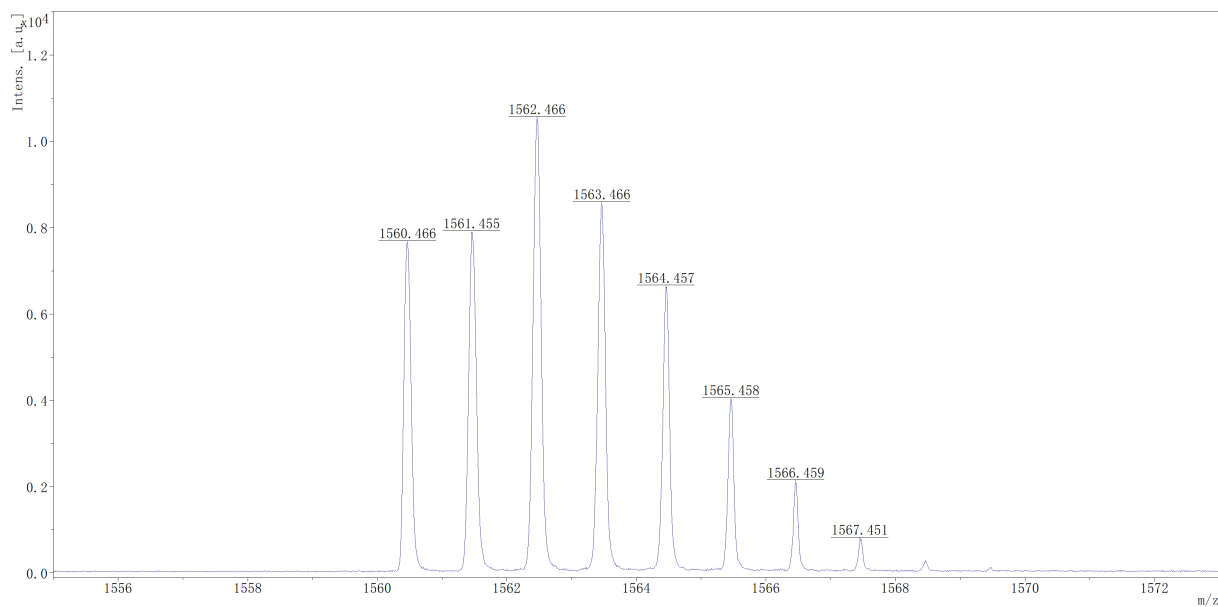

Fig. S5 MALDI-TOF mass spectrum of BTP-S12.

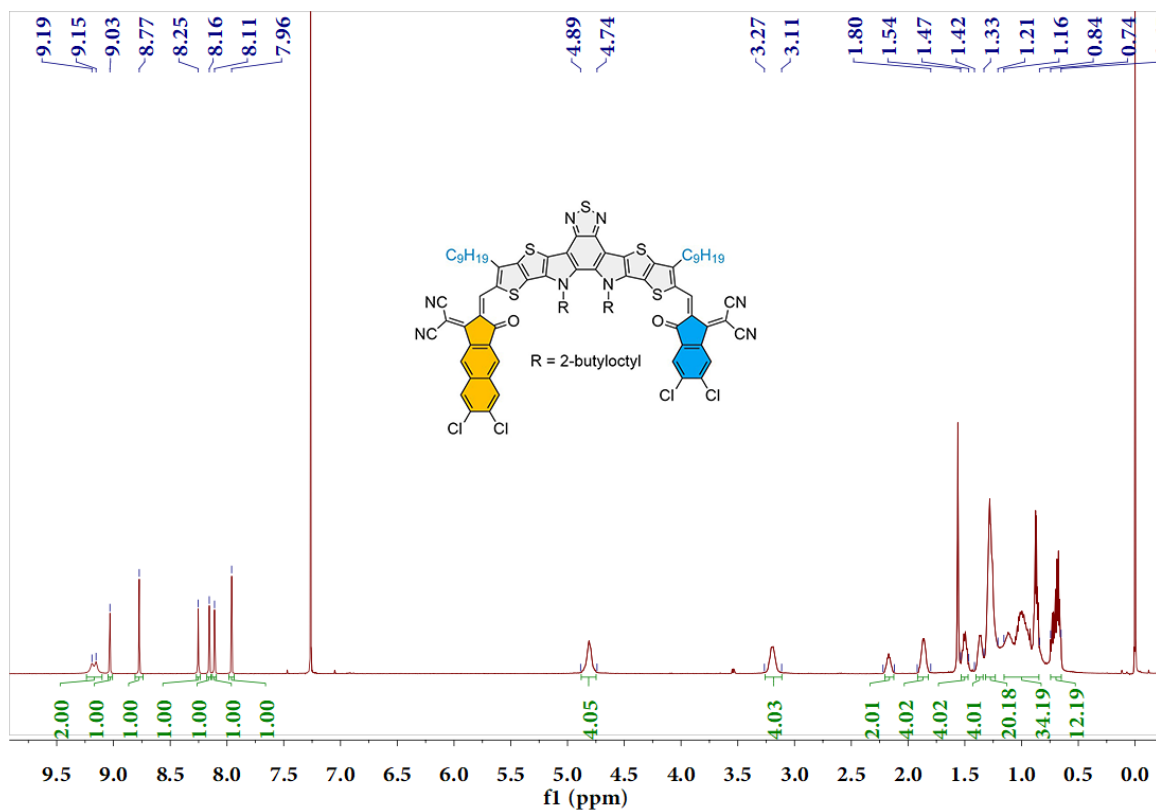

**Fig. S6** <sup>1</sup>H NMR spectrum of BTP-S15.

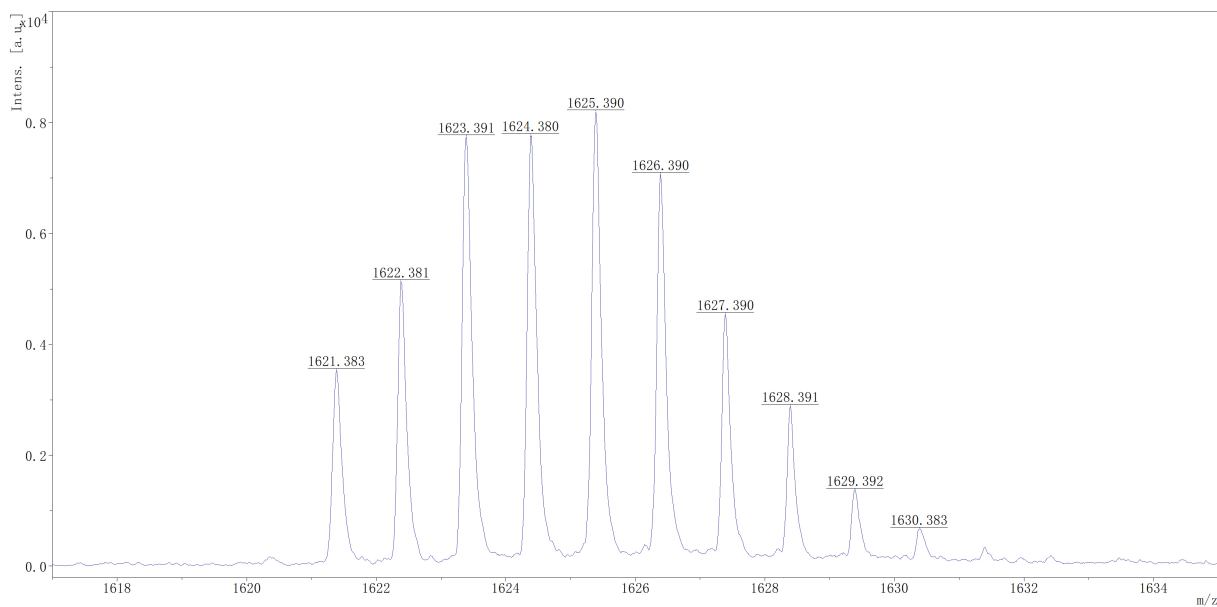

**Fig. S7** MALDI-TOF mass spectrum of BTP-S15.

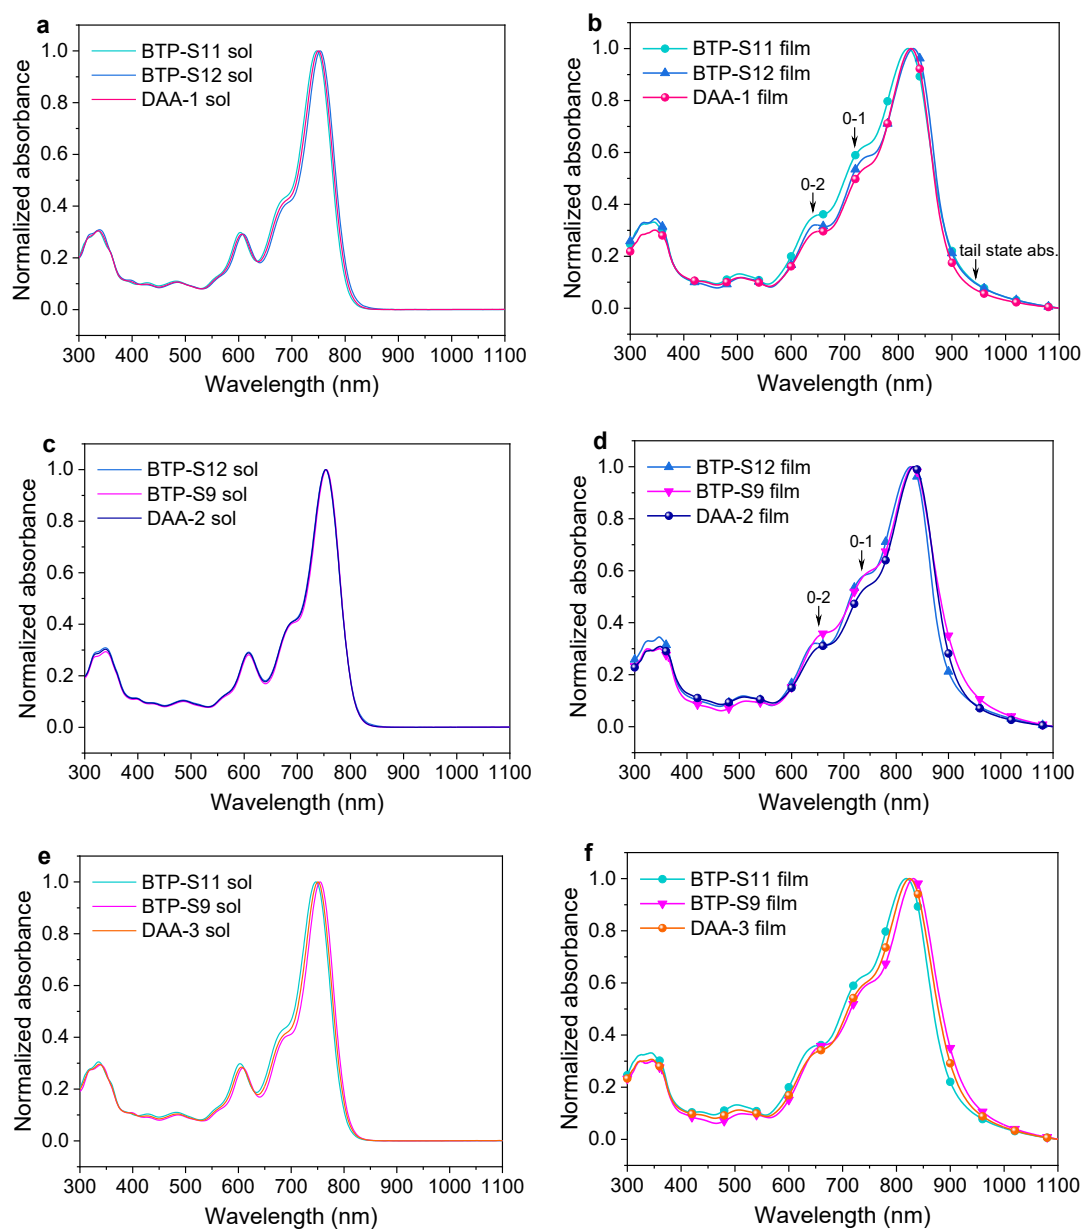

**Fig. S8** (a-b) Normalized absorption spectra of BTP-S11, BTP-S12 and DAA-1 in chloroform solutions and films. (c-d) Normalized absorption spectra of BTP-S12, BTP-S9 and DAA-2 in chloroform solutions and films. (e-f) Normalized absorption spectra of BTP-S11, BTP-S9 and DAA-3 in chloroform solutions and films.

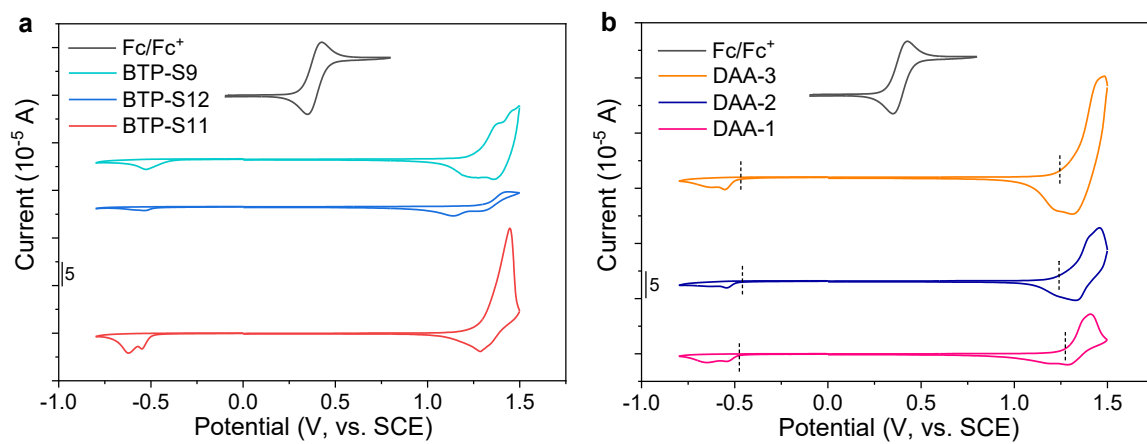

**Fig. S9** (a) Cyclic voltammograms of BTP-S11, BTP-S12 and BTP-S9. (b) Cyclic voltammograms of DAA-1, DAA-2 and DAA-3.

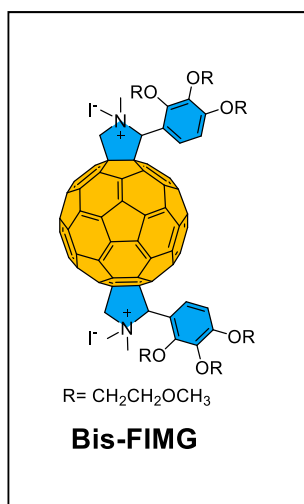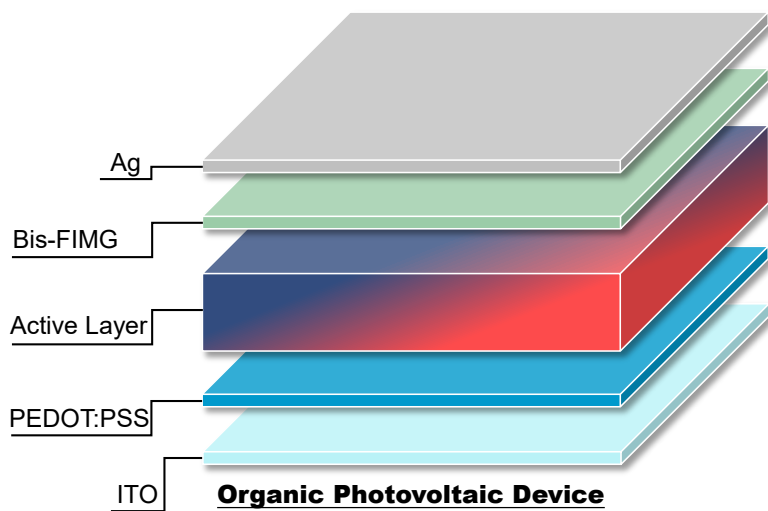

**Fig. S10** Chemical structure of Bis-FIMG and device structure of OPVs.

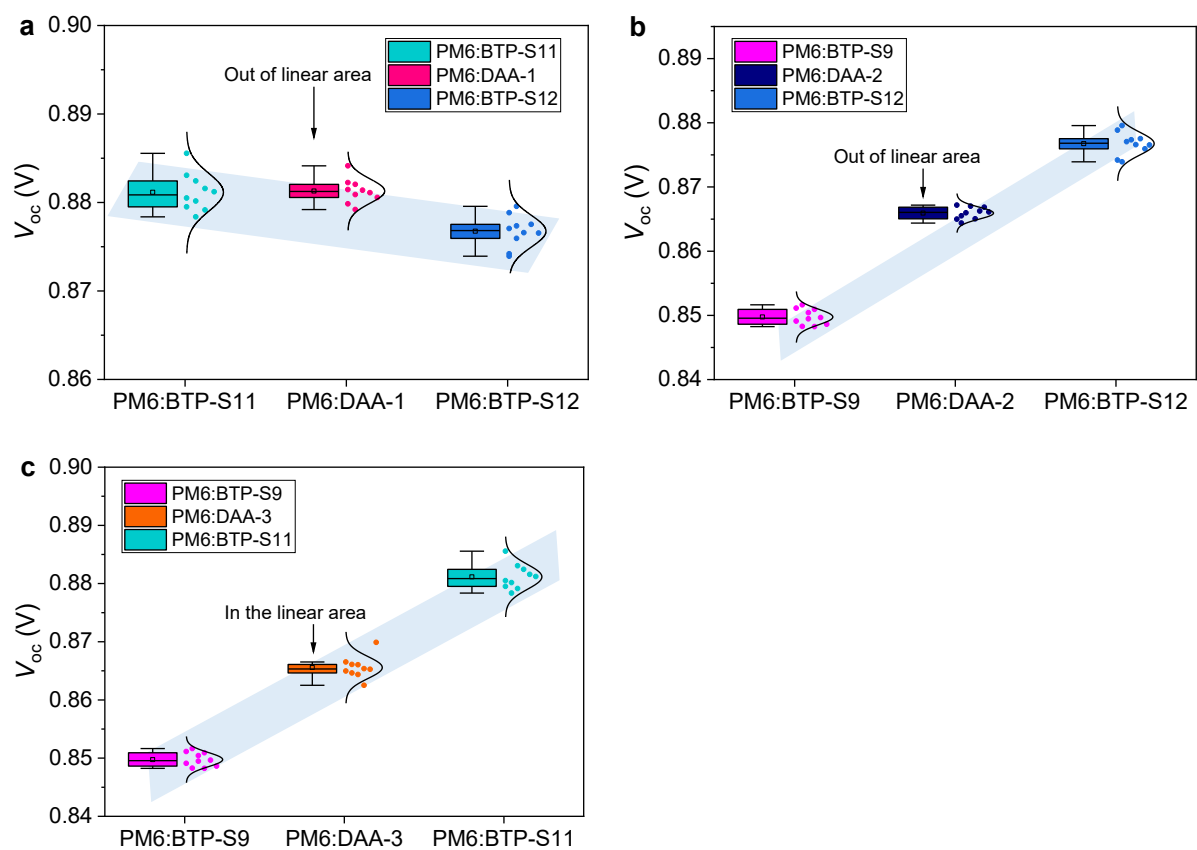

**Fig. S11** (a) Voltage comparison among PM6:BTP-S11, PM6:DAA-1 and PM6:BTP-S12-based OPVs. (b) Voltage comparison among PM6:BTP-S9, PM6:DAA-2 and PM6:BTP-S12-based OPVs. (c) Voltage comparison among PM6:BTP-S9, PM6:DAA-3 and PM6:BTP-S11-based OPVs.



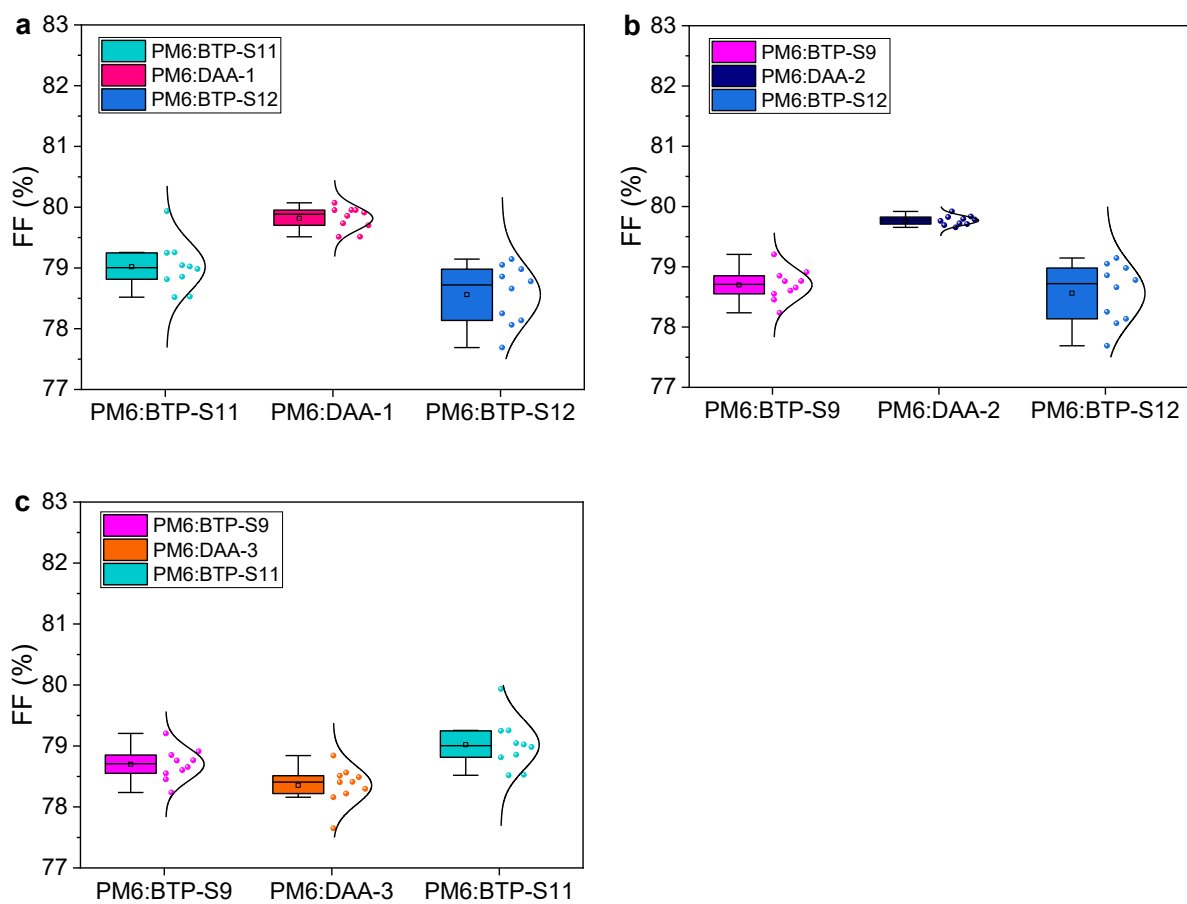

**Fig. S12** (a) FF comparison among PM6:BTP-S11, PM6:DAA-1 and PM6:BTP-S12-based OPVs. (b) FF comparison among PM6:BTP-S9, PM6:DAA-2 and PM6:BTP-S12-based OPVs. (c) FF comparison among PM6:BTP-S9, PM6:DAA-3 and PM6:BTP-S11-based OPVs.

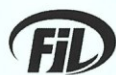

福建省计量科学研究院  
FUJIAN METROLOGY INSTITUTE  
(国家光伏产业计量测试中心)  
National PV Industry Measurement and Testing Center

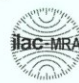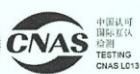

中国认可  
国际互认  
检测  
TESTING  
CNAS L0131

# 检测报告

## Test Report

报告编号: 22Q3-00030

Report No.

|                              |                                                                                 |
|------------------------------|---------------------------------------------------------------------------------|
| 客户名称<br>Name of Customer     | Zhejiang University                                                             |
| 联络信息<br>Contact Information  | Zhejiang University, No. 38 Yugu Road, Hangzhou, Zhejiang Province, P. R. China |
| 物品名称<br>Name of Items        | Organic Solar Cells                                                             |
| 型号/规格<br>Type /Specification | 1.5cm × 1.5cm                                                                   |
| 物品编号<br>Items No             | PM6:BTP-S11:BTP-S12                                                             |
| 制造厂商<br>Manufacturer         | Department of Polymer Science & Engineering, Zhejiang University                |
| 物品接收日期<br>Items Receipt Date | 2022-01-29                                                                      |
| 检测日期<br>Test Date            | 2022-01-29                                                                      |

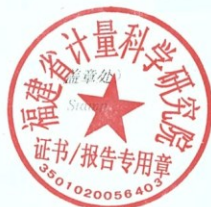

批准人 黎健生 黎健生  
Approved by  
核验员 何翔 何翔  
Checked by  
检测员 陈彩云 陈彩云  
Test by

发布日期 2022 年 02 月 08 日  
Date of Report Year month Day

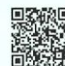

扫一扫 查真伪

本院/本中心地址: 福州市屏东路 9-3 号 电话: 0591-87845050 传真: 0591-87808417 邮编: 350003  
Address: 9-3 Pingdong Road, Fuzhou, China Telephone Fax Post Code  
网址: www.fjmi.net 咨询电话: 0591-87845050 投诉电话: 0591-87823025  
Web Site Inquire line Complaint Tel

未经本院/本中心书面批准, 部分复制采用本报告内容无效。  
Partly using this Report will not be admitted unless allowed by FMI/ Center.

第 1 页/共 7 页  
Page of Pages

**Fig. S13** The copy of certified report from National PV Industry Measurement and Testing Center (NPVIM) for ternary device (PM6:DAA-4 based ternary OPV).

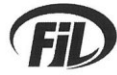

1. 检测机构说明:

Testing institutions that  
本院为国家法定计量检定机构, 国家光伏产业计量测试中心依托本院检测技术开展检测。本院/本中心质量管理体系符合 GB/T 27025 (ISO/IEC 17025, IDT) 标准要求。  
The institute is a national legal metrological institution. National PV Industry Measurement and Testing Center carries out testing relying on the institute's testing technology. The Center's quality management system meets the requirements of GB/T 27025 (ISO/IEC 17025, IDT) standard.

2. 本次检测所依据的检测方法(代号及名称):

Reference documents from the test (code.name)  
IEC 60904-1-2020 光伏器件-第一部分: 光伏电流-电压特性的测量; IEC 60904-8:2014 光伏器件-第8部分光伏器件的光谱响应度测量

3. 本次检测所使用的主要测量仪器:

Measurement standards used in this test

| 仪器名称<br>Name   | 仪器编号<br>Number | 测量范围<br>Measuring Range                           | 不确定度/或准确度等级/或最大允许误差<br>Uncertainty or Accuracy Class or Maximum Permissible Error                                                                        | 溯源机构名称/证书编号<br>Name of traceability institution/Certificate No. | 有效期限<br>Due date |
|----------------|----------------|---------------------------------------------------|----------------------------------------------------------------------------------------------------------------------------------------------------------|-----------------------------------------------------------------|------------------|
| 系统源表<br>(电子负载) | 4082810        | 100 nA~3 A;<br>(0.1~40) V                         | $U_{rel}=0.005\% (k=2)$                                                                                                                                  | 上海市计量院<br>2021F11-10-30830<br>69001                             | 2022-03-10       |
| 太阳模拟器          | 2015-006       | (300~1200)<br>nm; (800~<br>1200) W/m <sup>2</sup> | 光谱匹配度: (300~310) nm: $U_{rel}=7.4\% (k=2)$ ; (310~400) nm: $U_{rel}=6.4\% (k=2)$ ; (400~1200) nm: $U_{rel}=5.5\% (k=2)$ ;<br>辐照度比: $U_{rel}=1.2\% (k=2)$ | 福建计量院<br>21Q2-00682                                             | 2022-06-28       |
| WPVS 单晶硅标准电池   | 015-2014       | (300~1200)<br>nm                                  | $U_{rel}=1.3\% (k=2)$                                                                                                                                    | 中国计量院<br>GXgf2021-10725                                         | 2023-04-05       |
| Si 光电探测器       | Si-2           | (200~1100)nm                                      | (300~450) nm $U_{rel}=1.8\%~1.3\% (k=2)$ ;<br>(450~1000) nm $U_{rel}=1.2\%~1.7\% (k=2)$                                                                  | 中国计量院<br>GXgf2021-10903                                         | 2023-03-24       |
| 数字温度计          | 15-B           | (15~65)°C                                         | $U=0.1\% (k=2)$                                                                                                                                          | 福建计量院<br>21B2-08012                                             | 2022-06-22       |

4. 检测地点及环境条件:

Location and environmental condition for the test  
地点: Room 108, Building 4, MinHou Scientific Research Base  
Location  
温度: 24.5 °C                      相对湿度: 48 %                      其它: /  
Temperature                              Relative Humidity                              Others

5. 备注: /

Note

本报告提供的结果仅对本次被检的物品有效。  
The data are valid only for the instrument(s) under testing.

检测报告续页专用  
Continued page of test report

Fig. S13-continued The copy of certified report from National PV Industry Measurement and Testing Center (NPVIM) for ternary device (PM6:DAA-4 based ternary OPV).

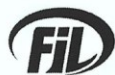

检测结果/说明:

Results of Test and additional explanation.

- 1 Standard Test Condition (STC): Total Irradiance: 1000 W/m<sup>2</sup>  
Temperature: 25.0 °C  
Spectral Distribution: AM1.5G

- 2 Measurement Data and I-V/P-V Curves under STC

Forward Scan

| $I_{sc}$<br>(mA) | $V_{oc}$<br>(V) | $I_{MPP}$<br>(mA) | $V_{MPP}$<br>(V) | $P_{MPP}$<br>(mW) | FF (%) | $\eta$ (%) |
|------------------|-----------------|-------------------|------------------|-------------------|--------|------------|
| 1.231            | 0.8848          | 1.142             | 0.7578           | 0.8654            | 79.45  | 18.51      |

Reverse Scan

| $I_{sc}$<br>(mA) | $V_{oc}$<br>(V) | $I_{MPP}$<br>(mA) | $V_{MPP}$<br>(V) | $P_{MPP}$<br>(mW) | FF (%) | $\eta$ (%) |
|------------------|-----------------|-------------------|------------------|-------------------|--------|------------|
| 1.231            | 0.8841          | 1.142             | 0.7578           | 0.8654            | 79.52  | 18.51      |

Mismatch factor: 0.9918

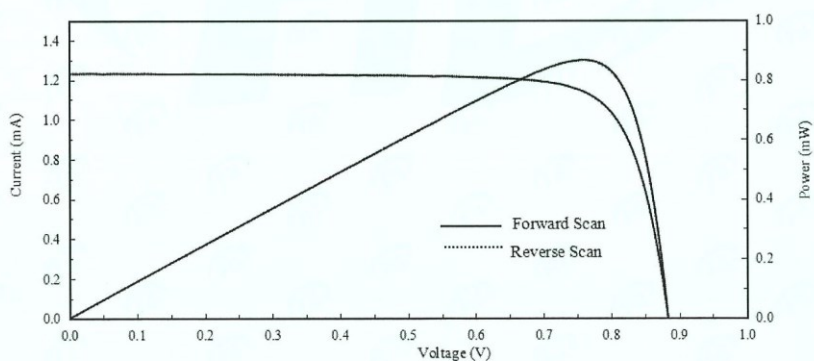

Figure 1. I-V and P-V characteristic curves of the measured sample under STC

**Fig. S13-continued** The copy of certified report from National PV Industry Measurement and Testing Center (NPVIM) for ternary device (PM6:DAA-4 based ternary OPV).

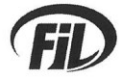

检测结果/说明:

Results of Test and additional explanation.

3 Measurement Data and Curve of Relative Spectral Responsivity (SR) of the Measured Sample

| Wavelength (nm) | SR(%)  | Wavelength (nm) | SR(%) |
|-----------------|-------|-----------------|-------|-----------------|-------|-----------------|--------|-----------------|-------|
| 300             | 0.26  | 445             | 55.36 | 590             | 82.68 | 735             | 99.05  | 880             | 34.62 |
| 305             | 0.52  | 450             | 56.03 | 595             | 83.46 | 740             | 99.41  | 885             | 28.70 |
| 310             | 1.25  | 455             | 56.69 | 600             | 84.00 | 745             | 99.50  | 890             | 25.51 |
| 315             | 2.51  | 460             | 57.30 | 605             | 84.44 | 750             | 99.60  | 895             | 20.42 |
| 320             | 4.22  | 465             | 58.13 | 610             | 84.35 | 755             | 99.47  | 900             | 16.33 |
| 325             | 6.45  | 470             | 58.99 | 615             | 84.66 | 760             | 99.31  | 905             | 13.22 |
| 330             | 8.88  | 475             | 60.06 | 620             | 85.06 | 765             | 99.43  | 910             | 10.43 |
| 335             | 11.25 | 480             | 61.19 | 625             | 85.31 | 770             | 99.83  | 915             | 8.33  |
| 340             | 13.41 | 485             | 62.25 | 630             | 85.77 | 775             | 99.91  | 920             | 6.15  |
| 345             | 15.32 | 490             | 63.42 | 635             | 86.00 | 780             | 99.87  | 925             | 5.14  |
| 350             | 17.04 | 495             | 64.68 | 640             | 86.66 | 785             | 100.00 | 930             | 3.98  |
| 355             | 18.69 | 500             | 65.84 | 645             | 87.01 | 790             | 99.85  | 935             | 3.07  |
| 360             | 20.22 | 505             | 67.16 | 650             | 87.16 | 795             | 99.48  | 940             | 2.34  |
| 365             | 21.92 | 510             | 68.27 | 655             | 87.86 | 800             | 99.12  | 945             | 1.85  |
| 370             | 23.19 | 515             | 69.60 | 660             | 89.03 | 805             | 98.46  | 950             | 1.47  |
| 375             | 24.43 | 520             | 70.89 | 665             | 89.92 | 810             | 97.39  | 955             | 1.17  |
| 380             | 25.93 | 525             | 71.97 | 670             | 90.88 | 815             | 96.24  | 960             | 0.94  |
| 385             | 27.81 | 530             | 73.13 | 675             | 92.03 | 820             | 94.72  | 965             | 0.77  |
| 390             | 30.21 | 535             | 74.11 | 680             | 92.78 | 825             | 92.72  | 970             | 0.61  |
| 395             | 33.00 | 540             | 75.13 | 685             | 93.77 | 830             | 91.26  | 975             | 0.46  |
| 400             | 35.92 | 545             | 76.19 | 690             | 94.56 | 835             | 88.86  | 980             | 0.34  |
| 405             | 39.15 | 550             | 77.25 | 695             | 95.29 | 840             | 84.99  | 985             | 0.25  |
| 410             | 42.39 | 555             | 78.08 | 700             | 95.82 | 845             | 80.91  | 990             | 0.20  |
| 415             | 45.53 | 560             | 78.88 | 705             | 96.59 | 850             | 75.89  | 995             | 0.14  |
| 420             | 48.18 | 565             | 79.54 | 710             | 97.09 | 855             | 69.18  | 1000            | 0.12  |
| 425             | 50.46 | 570             | 80.18 | 715             | 97.58 | 860             | 62.70  | /               | /     |
| 430             | 52.26 | 575             | 80.67 | 720             | 98.21 | 865             | 55.55  | /               | /     |
| 435             | 53.59 | 580             | 81.31 | 725             | 98.48 | 870             | 48.46  | /               | /     |
| 440             | 54.59 | 585             | 81.87 | 730             | 98.81 | 875             | 41.59  | /               | /     |

省计  
书

检测报告续页专用  
Continued page of test report

Fig. S13-continued The copy of certified report from National PV Industry Measurement and Testing Center (NPVIM) for ternary device (PM6:DAA-4 based ternary OPV).

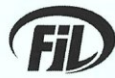

检测结果/说明:

Results of Test and additional explanation.

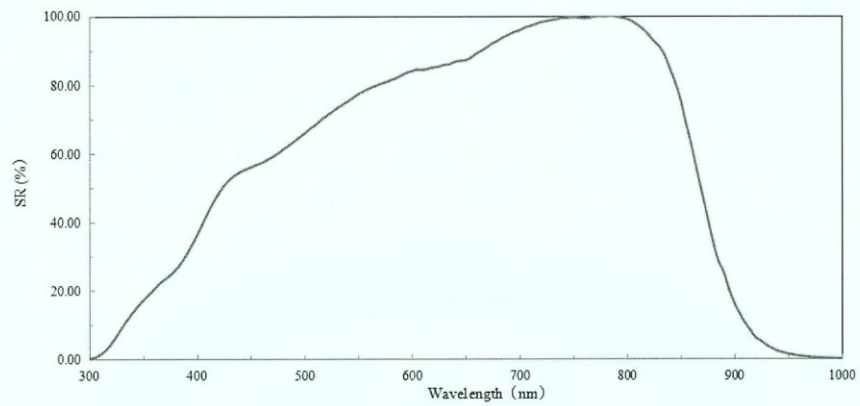

Figure 2. Relative spectral responsivity curve of the measured sample

4 Pictures of the Measured Sample

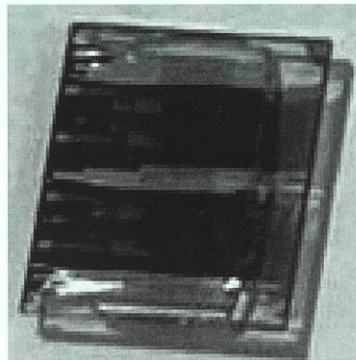

Figure 3. Obverse side of the measured sample

**Fig. S13-continued** The copy of certified report from National PV Industry Measurement and Testing Center (NPVIM) for ternary device (PM6:DAA-4 based ternary OPV).

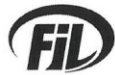

检测结果/说明:

Results of Test and additional explanation.

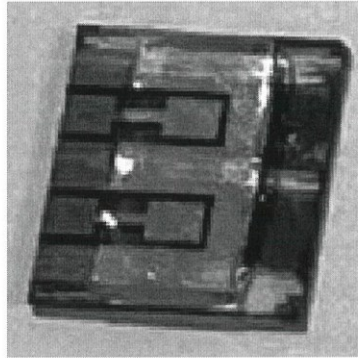

Figure 4. Reverse side of the measured sample

Uncertainty of measurement results:

Short-Circuit Current:  $U_{rel}=1.4\%$  ( $k=2$ ); Open-Circuit Voltage:  $U_{rel}=1.0\%$  ( $k=2$ );

Maximum Power:  $U_{rel}=2.2\%$  ( $k=2$ ); Efficiency:  $U_{rel}=2.2\%$  ( $k=2$ ); Fill Factor:  $U_{rel}=3.2\%$  ( $k=2$ ).

Relative Spectral Responsivity:

(300~400) nm:  $U_{rel} = 2.2\%$  ( $k=2$ );

(400~1000) nm:  $U_{rel} = 1.8\%$  ( $k=2$ ).

说明: The effective area of the measured sample was  $0.04675 \text{ cm}^2$ .

Explanation

科学  
奇缘

| Testing method (code and name) for this test                                                                       |
|--------------------------------------------------------------------------------------------------------------------|
| IEC 60904-1: 2020 Photovoltaic devices- Part 1: Measurement of photovoltaic current-voltage characteristics        |
| IEC 60904-8: 2014 Photovoltaic devices- Part 8: Measurement of spectral responsivity of a photovoltaic (PV) device |

检测报告续页专用  
Continued page of test report

**Fig. S13-continued** The copy of certified report from National PV Industry Measurement and Testing Center (NPVIM) for ternary device (PM6:DAA-4 based ternary OPV).

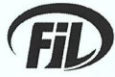

检测结果/说明:

Results of Test and additional explanation.

| Measurement standards used in this test     |                |                                               |                                                                                                                                                                            |                                                                                |            |
|---------------------------------------------|----------------|-----------------------------------------------|----------------------------------------------------------------------------------------------------------------------------------------------------------------------------|--------------------------------------------------------------------------------|------------|
| Name                                        | Number         | Measuring Range                               | Uncertainty or Accuracy Class or Maximum Permissible Error                                                                                                                 | Name of traceability institution/Certificate No.                               | Due date   |
| System SourceMeter (Electronic Load)        | 4082810        | 100 nA~3 A;<br>(0.1~40) V                     | $U_{rel}=0.005\% (k=2)$                                                                                                                                                    | Shanghai Institute of Metrology and Testing Technology / 2021F11-10-3083069001 | 2022-03-10 |
| Solar Simulator                             | 2015-006       | (300~1200) nm;<br>(800~1200) W/m <sup>2</sup> | Spectral Match: (300~310) nm: $U_{rel}=7.4\% (k=2)$ ; (310~400) nm: $U_{rel}=6.4\% (k=2)$ ; (400~1200) nm: $U_{rel}=5.5\% (k=2)$ ; Irradiance Ratio: $U_{rel}=1.2\% (k=2)$ | Fujian Metrology Institute/ 21Q2-00682                                         | 2022-06-28 |
| WPVS Monocrystalline Silicon Reference Cell | 015-2014       | (300~1200) nm                                 | $U_{rel}=1.3\% (k=2)$                                                                                                                                                      | National Institute of Metrology/ GXgf2021-10725                                | 2023-04-05 |
| Si Photoelectric Detector                   | Si-2           | (200~1100) nm                                 | (300 nm~450 nm) $U_{rel}=1.8\%~1.3\% (k=2)$ ; (450 nm~1000 nm) $U_{rel}=1.2\%~1.7\% (k=2)$                                                                                 | National Institute of Metrology/ GXgf2021-10903                                | 2023-03-24 |
| Digital Thermometer                         | 15-B (Q0078.1) | (15~65)°C                                     | $U=0.1\% (k=2)$                                                                                                                                                            | Fujian Metrology Institute/21B2-08012                                          | 2022-06-22 |

以下空白  
Blank below

检测报告续页专用  
Continued page of test report

**Fig. S13-continued** The copy of certified report from National PV Industry Measurement and Testing Center (NPVIM) for ternary device (PM6:DAA-4 based ternary OPV).



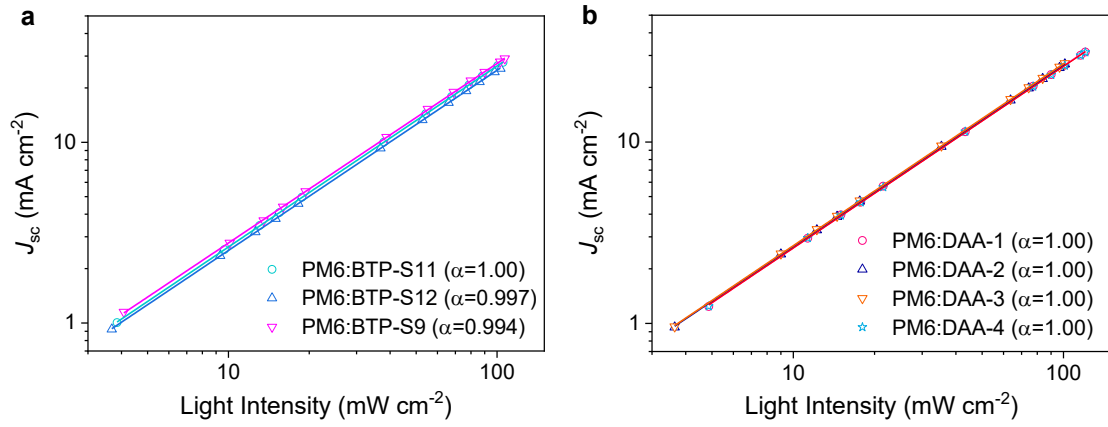

**Fig. S14** (a) The dependence of  $J_{sc}$  on light intensity ( $P_{light}$ ) of relevant binary OPVs. (b) The dependence of  $J_{sc}$  on  $P_{light}$  of relevant ternary OPVs.

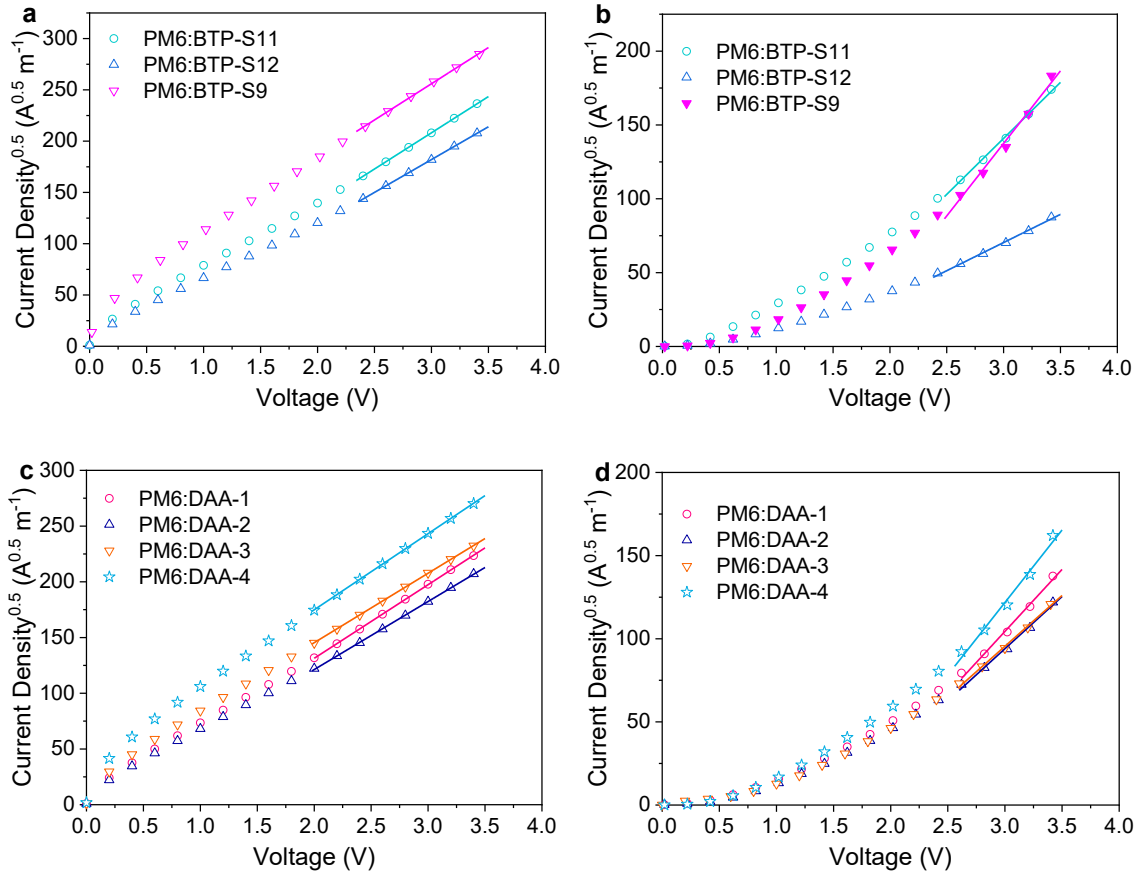

**Fig. S15** (a)  $J^{0.5}$ - $V$  curves of the hole-only devices based on PM6:BTP-S11, PM6:BTP-S12 and PM6:BTP-S9 blends (Device: ITO/PEDOT:PSS/Active layer/MoO<sub>3</sub>/Ag). (b)  $J^{0.5}$ - $V$  curves of the electron-only devices based on PM6:BTP-S11, PM6:BTP-S12 and PM6:BTP-S9 blends (Device: ITO/ZnO/Active layer/Bis-FIMG/Ag). (c)  $J^{0.5}$ - $V$  curves of the hole-only devices based on PM6:DAA-1, PM6:DAA-2, PM6:DAA-3 and PM6:DAA-4 blends (Device: ITO/PEDOT:PSS/Active layer/MoO<sub>3</sub>/Ag). (d)  $J^{0.5}$ - $V$  curves of the electron-only devices based on PM6:DAA-1, PM6:DAA-2, PM6:DAA-3 and PM6:DAA-4 blends (Device: ITO/ZnO/Active layer/Bis-FIMG/Ag).

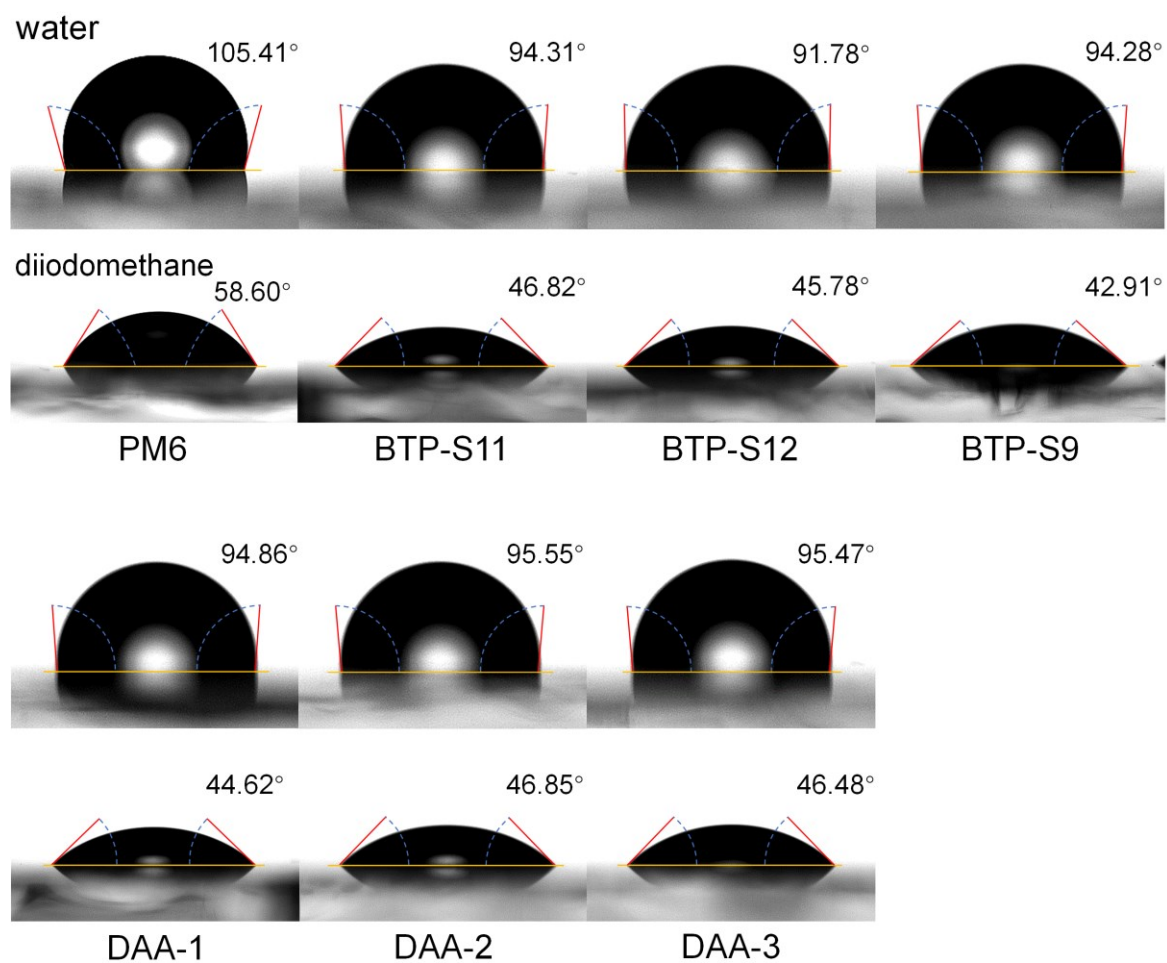

**Fig. S16** Contact angle images of PM6, BTP-S11, BTP-S12, BTP-S9, DAA-1, DAA-2 and DAA-3 films with water and diiodomethane droplets on top. Relevant miscibility parameters are summarized in **Table S3**.

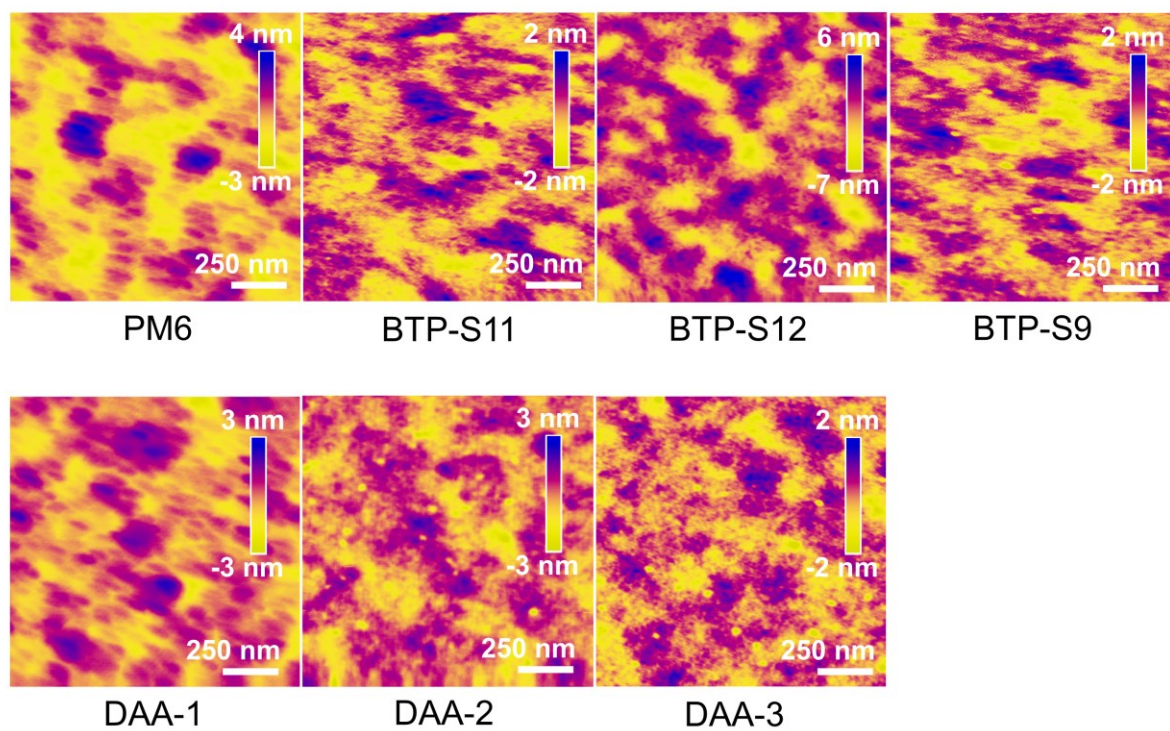

**Fig. S17** AFM height images of PM6, BTP-S11, BTP-S12, BTP-S9, DAA-1, DAA-2 and DAA-3 films. Relevant roughness data are listed in **Table S3**.

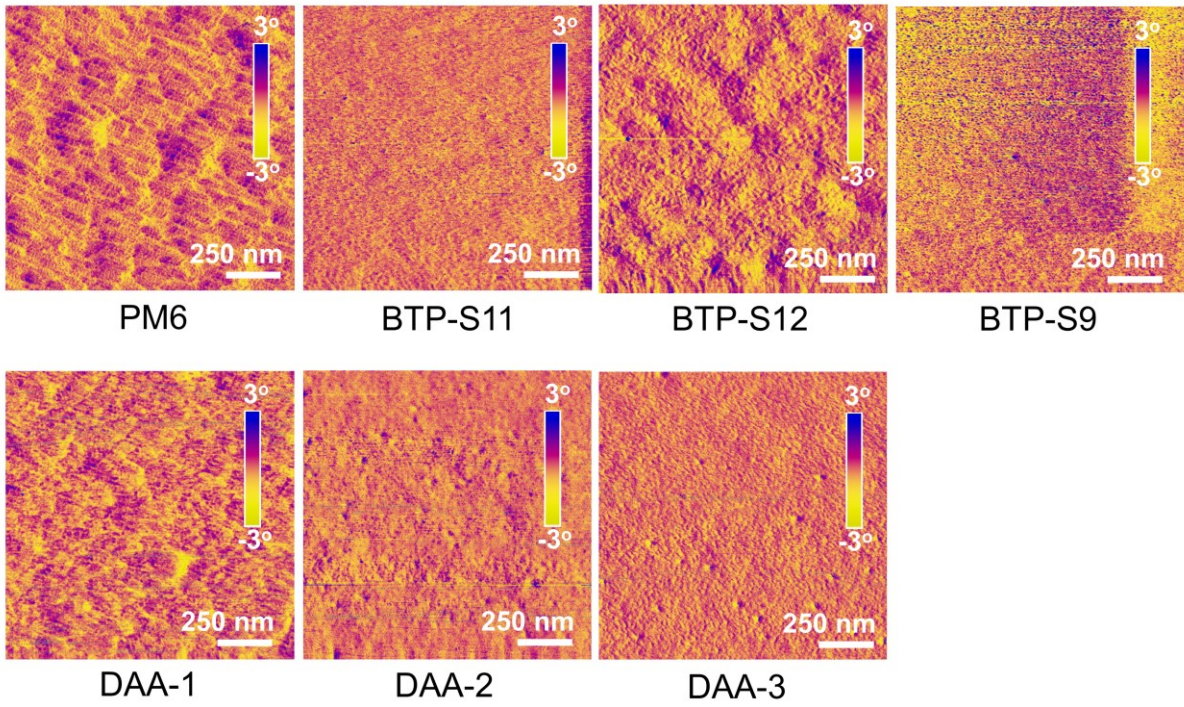

**Fig. S18** AFM phase images of PM6, BTP-S11, BTP-S12, BTP-S9, DAA-1, DAA-2 and DAA-3 films.

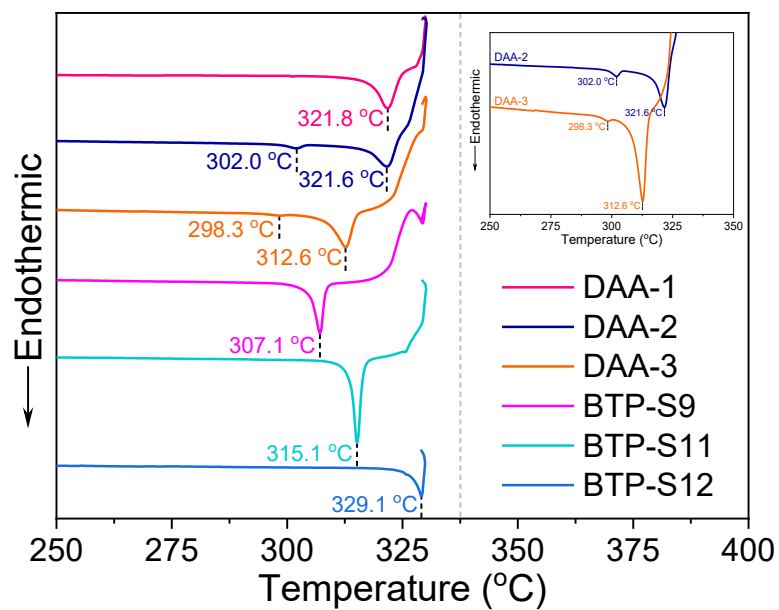

**Fig. S19** DSC curves of BTP-S9, BTP-S11, BTP-S12, DAA-1, DAA-2 and DAA-3.

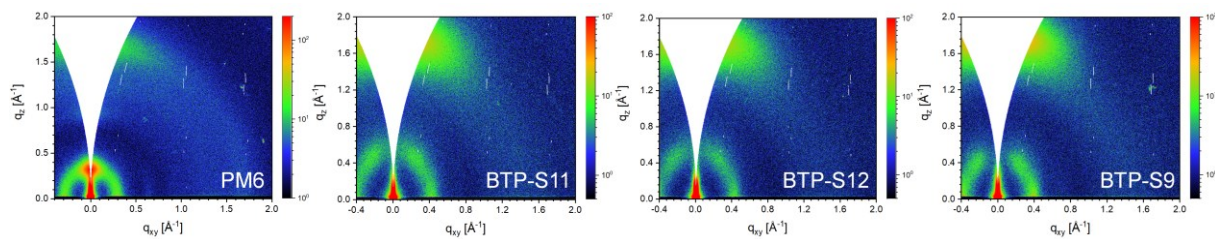

**Fig. S20** 2D GIWAXS images for PM6, BTP-S11, BTP-S12 and BTP-S9 neat films.

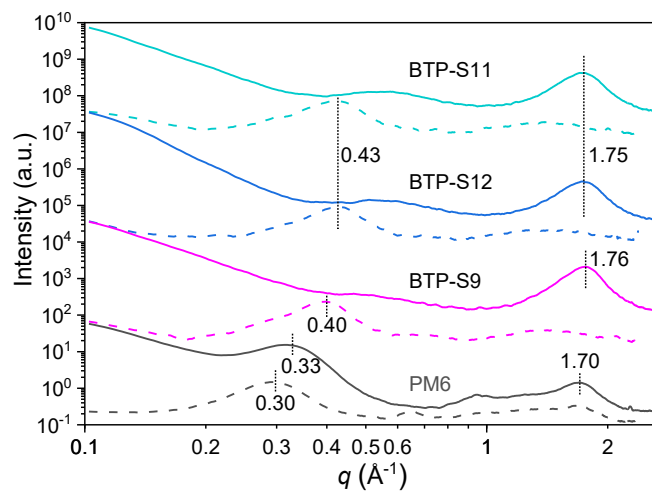

**Fig. S21** 1D intensity profiles of PM6, BTP-S11, BTP-S12 and BTP-S9 neat films in the out-of-plane (OOP, solid lines) and in-plane (IP, dash lines) directions.

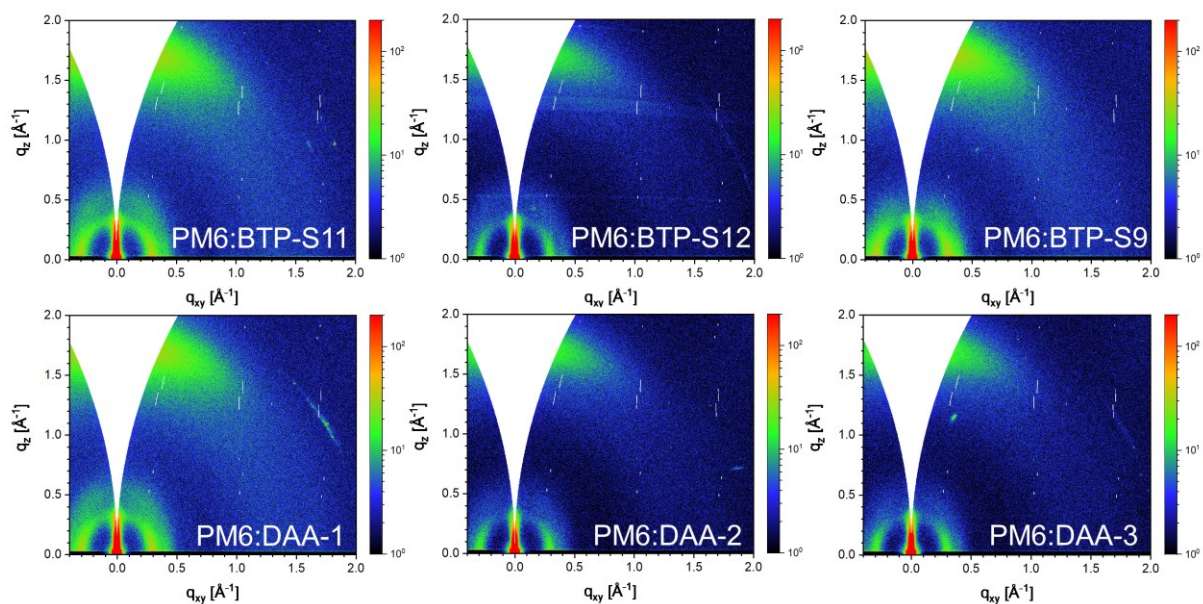

**Fig. S22** 2D GIWAXS images for PM6:BTP-S11, PM6:BTP-S12, PM6:BTP-S9, PM6:DAA-1, PM6:DAA-2 and PM6:DAA-3 blend films.

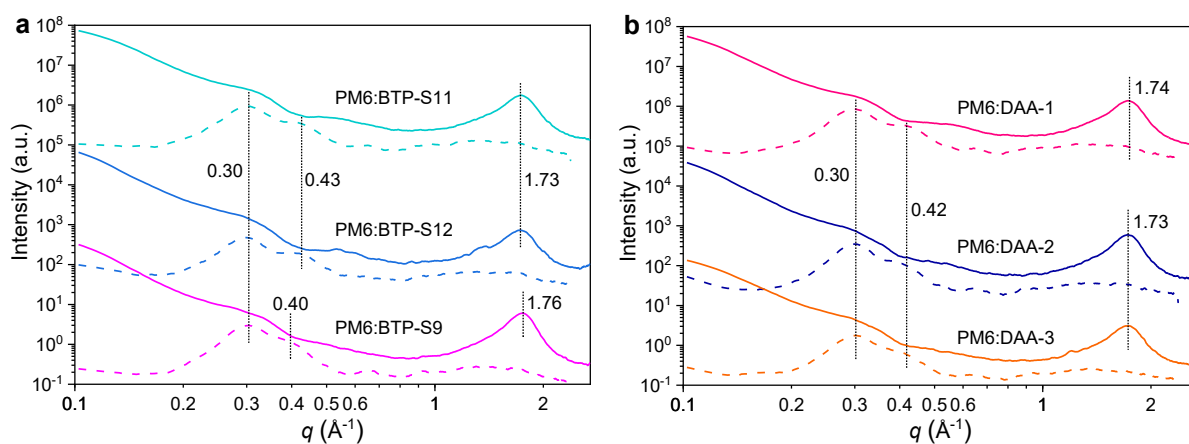

**Fig. S23** (a) 1D intensity profiles of PM6:BTP-S11, PM6:BTP-S12 and PM6:BTP-S9 blends in the OOP (solid lines) and IP (dash lines) directions. (b) 1D intensity profiles of PM6:DAA-1, PM6:DAA-2 and PM6:DAA-3 blends in the OOP (solid lines) and IP (dash lines) directions.



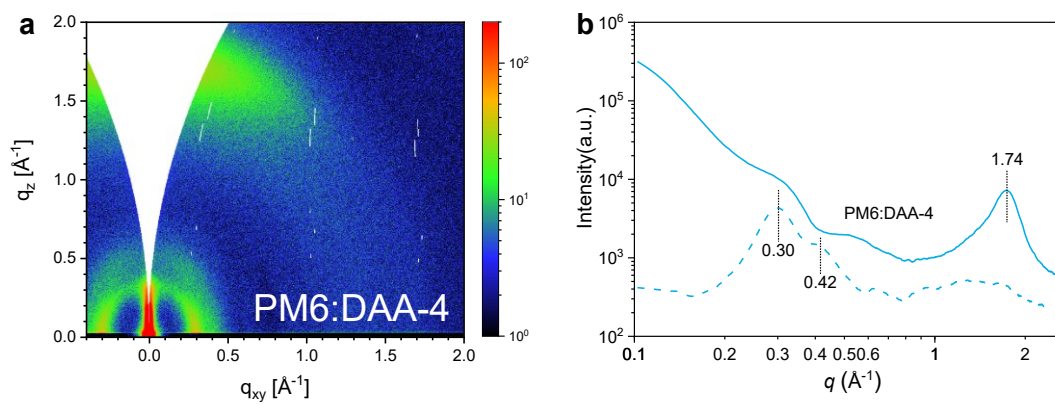

**Fig. S24** (a) 2D GIWAXS image of PM6:DAA-4 blend. (b) 1D intensity profiles of PM6:DAA-4 blend in the OOP (solid line) and IP (dash line) directions.

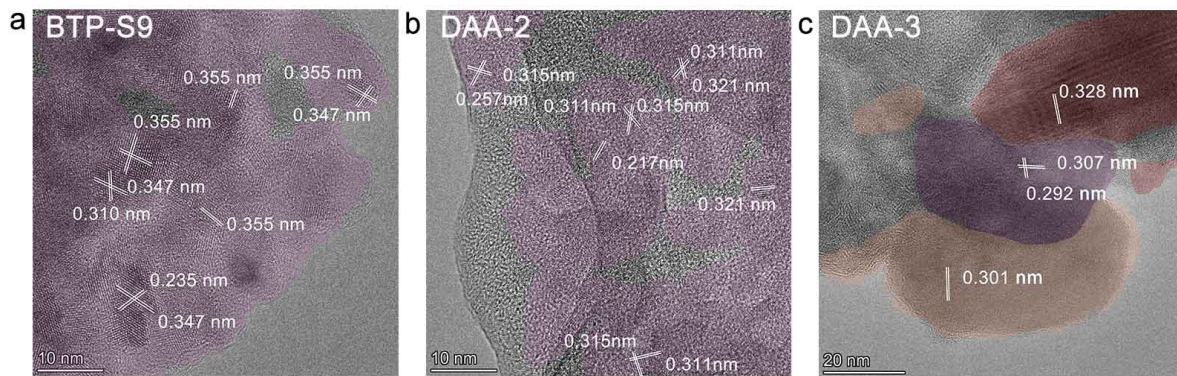

**Fig. S25** (a) HR-TEM image of BTP-S9 film. (b) HR-TEM image of DAA-2 film. (c) HR-TEM image of DAA-3 film.

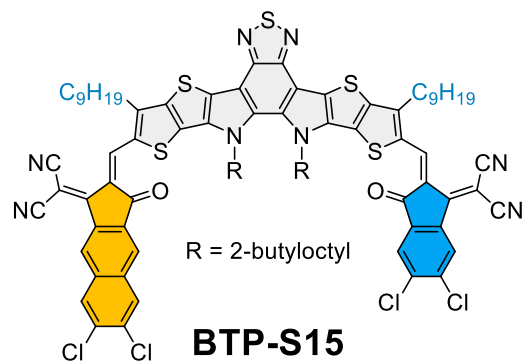

**Fig. S26** Chemical structure of BTP-S15.

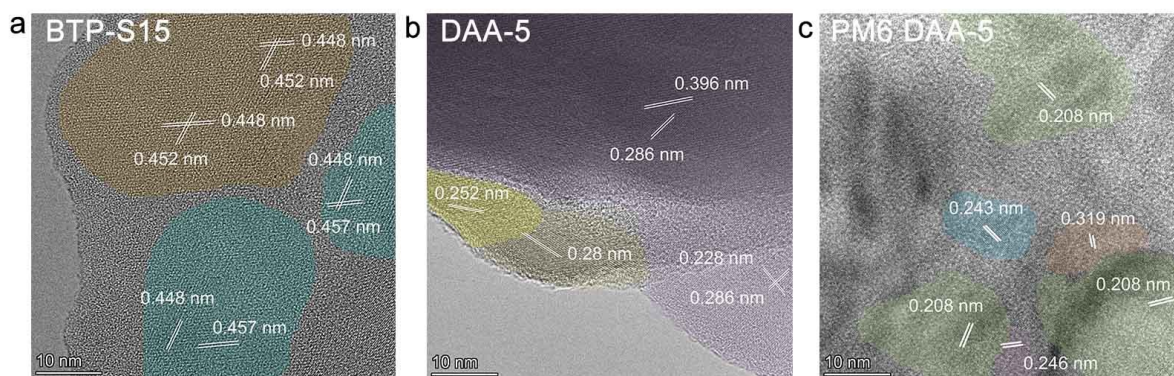

**Fig. S27** (a) HR-TEM image of BTP-S15 film. (b) HR-TEM image of DAA-5 film (DAA-5: BTP-S9:BTP-S15 = 1:1). (c) HR-TEM image of PM6:DAA-5 film.

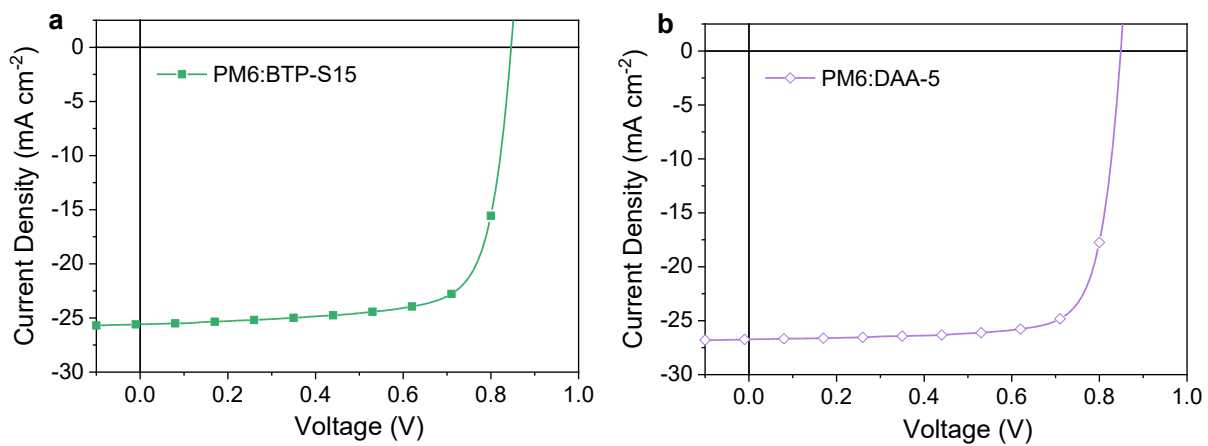

**Fig. S28** (a)  $J$ - $V$  curve of PM6:BTP-S15-based OPV ( $V_{oc}$ : 0.846 V;  $J_{sc}$ : 25.6 mA cm<sup>-2</sup>; FF: 74.9%; PCE: 16.1%). (b)  $J$ - $V$  curve of PM6:DAA-5-based OPV (DAA-5: BTP-S9:BTP-S15 = 1:1;  $V_{oc}$ : 0.849 V;  $J_{sc}$ : 26.7 mA cm<sup>-2</sup>; FF: 78.1%; PCE: 17.7%).

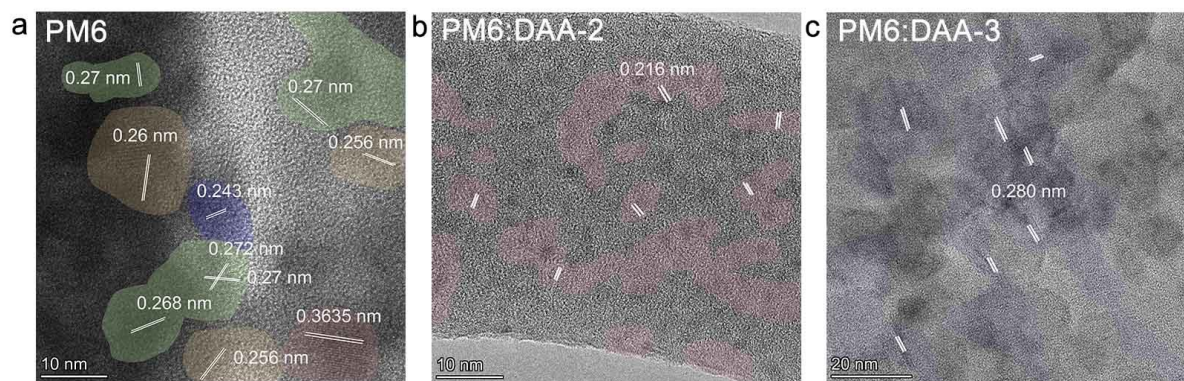

**Fig. S29** (a) HR-TEM image of PM6 film. (b) HR-TEM image of PM6:DAA-2 film. (c) HR-TEM image of PM6:DAA-3 film.

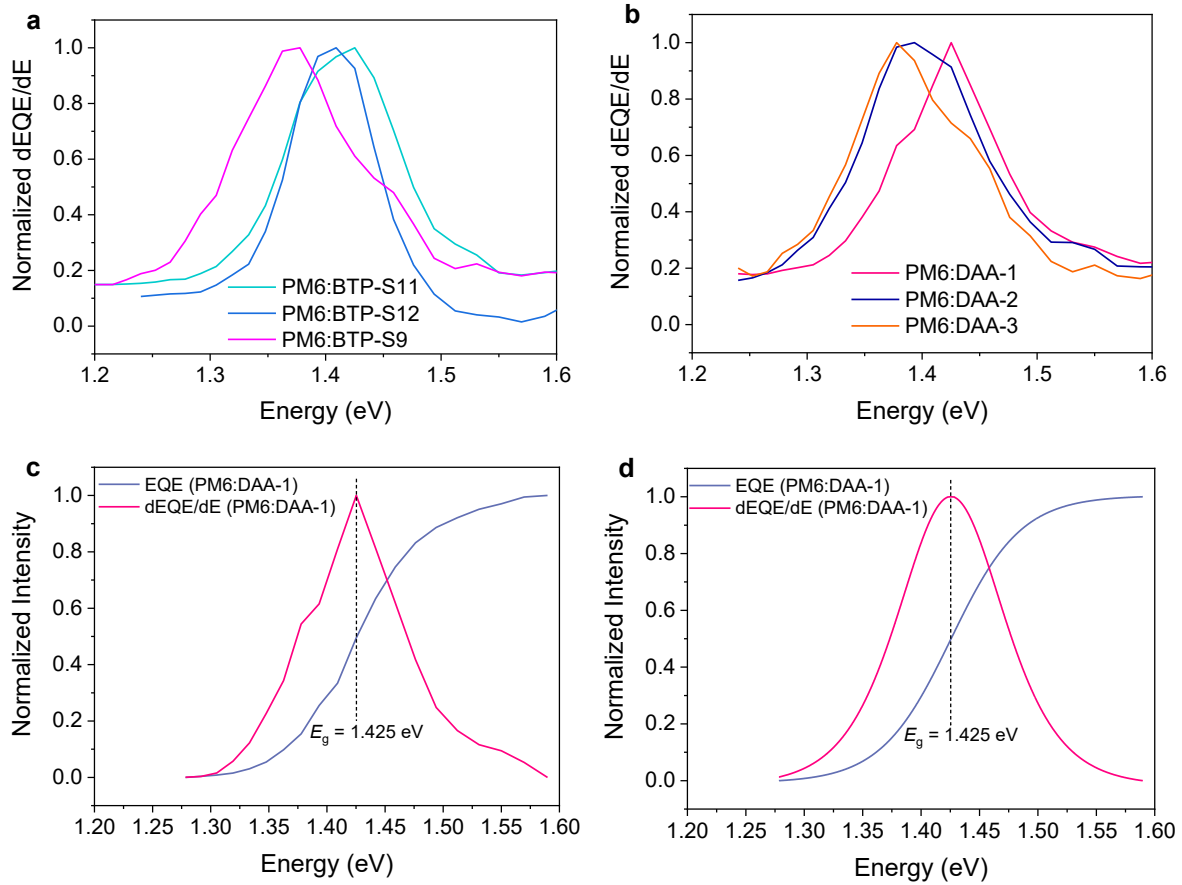

**Fig. S30** (a) Bandgap distributions for OPVs based on PM6:BTP-S11, PM6:BTP-S12 and PM6:BTP-S9 blends. (b) Bandgap distributions for OPVs based on PM6:DAA-1, PM6:DAA-2 and PM6:DAA-3 blends. (c) Determination of bandgap for PM6:DAA-1 based device. (d) Determination of bandgap for PM6:DAA-1 based device with the smoother EQE curve.

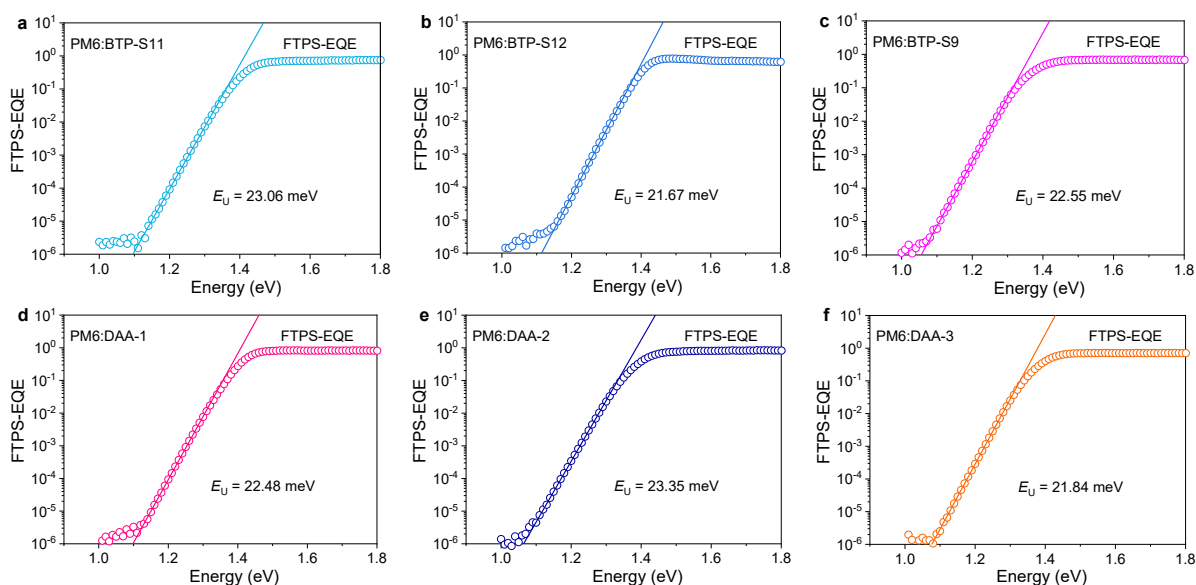

**Fig. S31** (a-f) Determination of Urbach energy ( $E_U$ ) via exponential fitting of FTSP-EQE curves for PM6:BTP-S11-based device (a), PM6:BTP-S12-based device (b), PM6:BTP-S9-based device (c), PM6:DAA-1-based device (d), PM6:DAA-2-based device (e), PM6:DAA-3-based device (f).

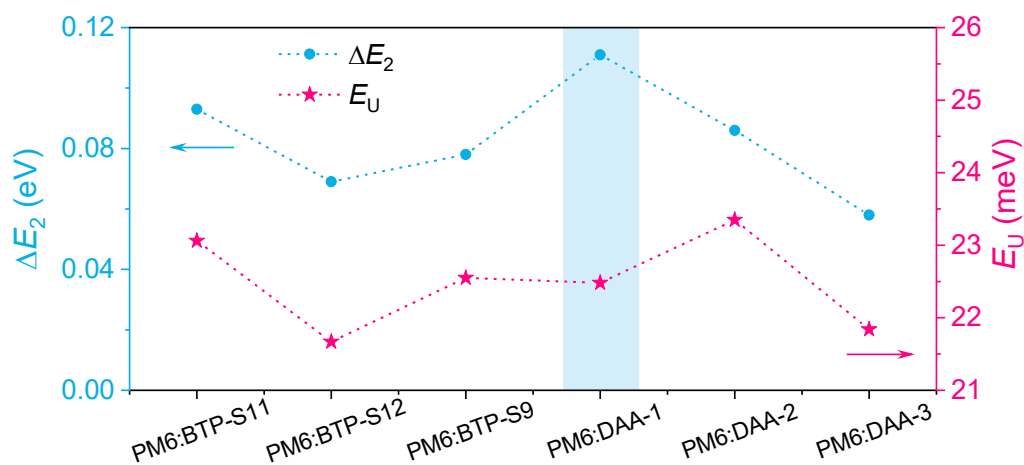

**Fig. S32** Comparison of  $\Delta E_2$  and  $E_U$  for relevant binary and ternary OPVs.

## Note S2: Boltzmann equilibrium

**Fig. 5a** shows the kinetic process involved with LE, CT and CS states, the non-radiative recombination loss will mainly happen on LE or CT states, particularly for CT states. Thus, the effective way for mitigating non-radiative loss is reducing the CT ratio. Accordingly, the Boltzmann equilibrium between LE and CT states will largely affect the CT ratio.

According to the Boltzmann probability distribution, the relative occupation of LE and CT states can be expressed as:

$$p_{LE} = \frac{g_1}{Q} \exp\left(-\frac{E_{LE}}{k_B T}\right); p_{CT} = \frac{g_2}{Q} \exp\left(-\frac{E_{CT}}{k_B T}\right) \quad (6)$$

where  $Q$  is the canonical partition function,  $E_{LE}$  and  $E_{CT}$  are the energies of LE and CT states,  $k_B$  is the Boltzmann constant, and  $T$  is the temperature in Kelvin.

Then, the equilibrium constant  $K$  can be calculated as:

$$K = \frac{p_{CT}}{p_{LE}} = \frac{g_2}{g_1} \exp\left(\frac{\Delta E_{LE-CT}}{k_B T}\right) \quad (7)$$

where  $\Delta E_{LE-CT} = E_{LE} - E_{CT}$ .

Under the stationary state for the reaction  $LE \rightleftharpoons CT$ , we can identify that:

$$K = \frac{k_{12}}{k_{21}} = \frac{g_2}{g_1} \exp\left(\frac{\Delta E_{LE-CT}}{k_B T}\right) \quad (8)$$

With equation (8), we can conclude that, reducing  $\Delta E_{LE-CT}$  will reduce the equilibrium constant  $K$  between LE and CT states, thus reducing CT ratio for non-radiative loss mitigation.

However, above conclusion is based on the prerequisite that only Boltzmann equilibrium between LE and CT states is considered. In our work, we observe an obvious non-radiative loss reduction, due to luminescence efficiency enhancement of over 2 times, while the energetic offset ( $\Delta E_{LE-CT}$ ) is less changed, which doesn't conform to above conclusion. This indicates more process should be considered for the Boltzmann equilibrium analysis. For non-fullerene



acceptors, especially Y-series molecules, it's detected that self-separation of exciton directly from LE to CT states exists, thus the process between LE and CS states should also be considered for Boltzmann equilibrium analysis.

Similarly, the relative occupation of CS state can be expressed as:

$$p_{CS} = \frac{g_3}{Q} \exp\left(-\frac{E_{CS}}{k_B T}\right) \quad (9)$$

where  $E_{CS}$  is the energy of CS state.

Then the modified equilibrium constant  $K'$  can be changed to:

$$\begin{aligned} K' &= \frac{p_{CT}}{p_{LE} + p_{CS}} = \frac{g_2 \exp\left(-\frac{E_{CT}}{k_B T}\right)}{g_1 \exp\left(-\frac{E_{LE}}{k_B T}\right) + g_3 \exp\left(-\frac{E_{CS}}{k_B T}\right)} \\ &= \frac{1}{g_{12} \exp\left(-\frac{\Delta E_{LE-CT}}{k_B T}\right) + g_{32} \exp\left(-\frac{\Delta E_{CS-CT}}{k_B T}\right)} \end{aligned} \quad (10)$$

Where  $g_{12} = g_1/g_2$ ,  $g_{32} = g_3/g_2$ .

So, under the stationary state for the reaction  $CT \rightleftharpoons LE \rightleftharpoons CS$ , we can identify that:

$$K' = \frac{k_{12}}{k_{21} + k_{13}} = \frac{1}{g_{12} \exp\left(-\frac{\Delta E_{LE-CT}}{k_B T}\right) + g_{32} \exp\left(-\frac{\Delta E_{CS-CT}}{k_B T}\right)} \quad (11)$$

According to equation (11), we can learn that, the reduction of  $K'$  will be determined by both  $\Delta E_{LE-CT}$  and  $\Delta E_{CS-CT}$ . Thus, for small driving force systems, both  $\Delta E_{LE-CT}$  and  $\Delta E_{CS-CT}$  are critical for non-radiative loss mitigation. Besides, a reduction of  $\Delta E_{CS-CT}$  may also promote the conversion rate ( $k_{23}$ ) from CT state to CS state, thus further reducing the CT ratio. So, Boltzmann equilibrium among LE, CT and CS states should be responsible for the non-radiative loss mitigation in small driving force systems.

**Note S3:  $\Delta E_{CS-CT}$** 

As shown above, the variation of  $\Delta E_{CS-CT}$  may also put an effect on the non-radiative loss. Now we analyze the possible factor affecting the  $\Delta E_{CS-CT}$ . For donor (D) / acceptor (A) systems, there exists energy level bending at the D/A interfaces, as shown in **Fig. 5b**. The happening of energy level bending at the D/A interfaces is due to the electrostatic interaction of charges with quadrupole moments of surrounding molecules.

The energy level bending phenomenon will result in a parameter named as interfacial bending energy ( $B$ ), which can be expressed as:

$$B = B_h^D + B_h^A = B_e^D + B_e^A \quad (12)$$

Thus, the dissociation energy of CT state can be expressed as:

$$\Delta E_{CS-CT} = E_{CS} - E_{CT} = E_{Coulomb}^{CT} - B \quad (13)$$

So, we can learn that, enlarging the interfacial bending energy could be a way to reduce  $\Delta E_{CS-CT}$ , thus being the factor for reducing CT state ratio and non-radiative recombination loss.

---

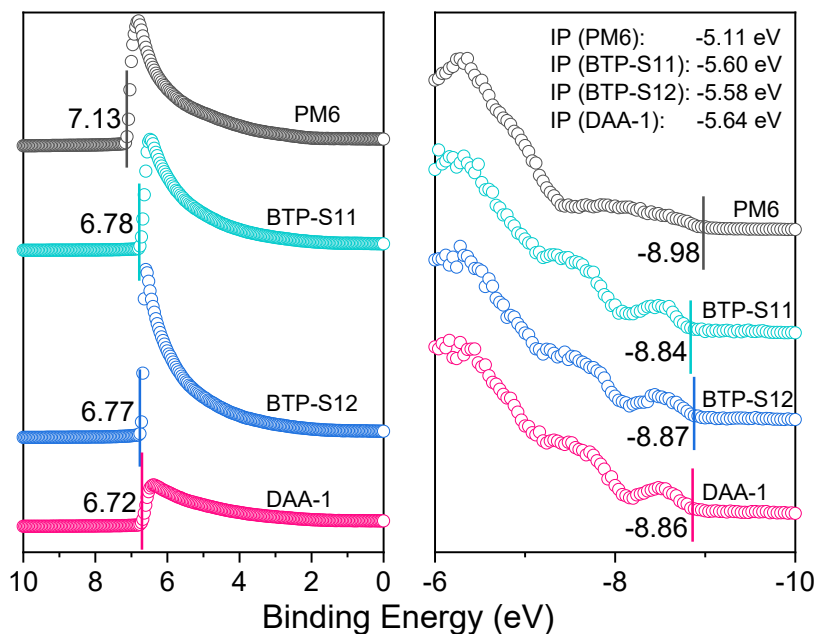

**Fig. S33** Ultraviolet photoelectron spectroscopy (UPS) data of PM6, BTP-S11, BTP-S12 and DAA-1 neat films (He I;  $h\nu = 21.22$  eV).

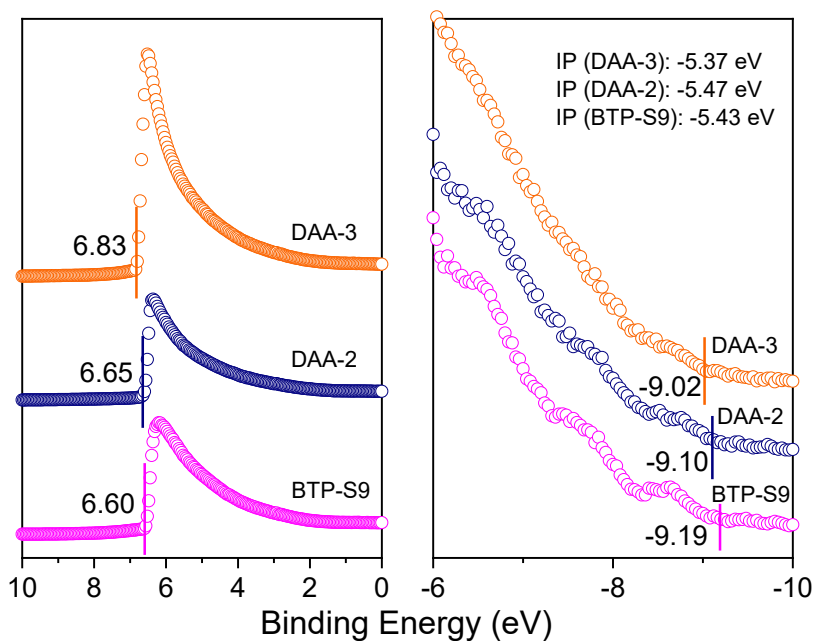

**Fig. S34** Ultraviolet photoelectron spectroscopy (UPS) data of BTP-S9, DAA-2, and DAA-3 neat films (He I;  $h\nu = 21.22$  eV).

#### **Note S4: Interfacial bending energy ( $B$ )**

As analyzed above, reducing  $\Delta E_{CS-CT}$  will require an increase of interfacial bending energy ( $B$ ).

To accurately calculate the interfacial bending energy, we measured the ionization potential (IP) energy levels for PM6, BTP-S11, BTP-S12, BTP-S9, DAA-1, DAA-2 and DAA-3 neat films

via ultraviolet photoelectron spectroscopy (UPS), and the results are displayed in **Figs. S33-34**.

The IP values are calculated as -5.11 eV for PM6, -5.60 eV for BTP-S11, -5.58 eV for BTP-S12, -5.43 eV for BTP-S9, -5.64 eV for DAA-1, -5.47 eV for DAA-2 and -5.37 eV for DAA-3.

Since the energetic offset can be expressed as:

$$\Delta E_{LE-CT} = \Delta IP - B \quad (14)$$

We can then calculate the bending energy  $B$  via the following equation:

$$B = \Delta IP - \Delta E_{LE-CT} \quad (15)$$

Since the  $\Delta IP$  values are found to be 0.49 eV for PM6:BTP-S11 system, 0.47 eV for PM6:BTP-S12 system, 0.32 eV for PM6:BTP-S9 system, 0.53 eV for PM6:DAA-1 system, 0.36 eV for PM6:DAA-2 system and 0.26 eV for PM6:DAA-3 system, then the bending energy  $B$  can be obtained as 0.439 eV for PM6:BTP-S11 system, 0.418 eV for PM6:BTP-S12 system, 0.279 eV for PM6:BTP-S9 system, 0.477 eV for PM6:DAA-1 system, 0.314 eV for PM6:DAA-2 system and 0.217 eV for PM6:DAA-3 system. The above results are also summarized in **Table S4**.

---

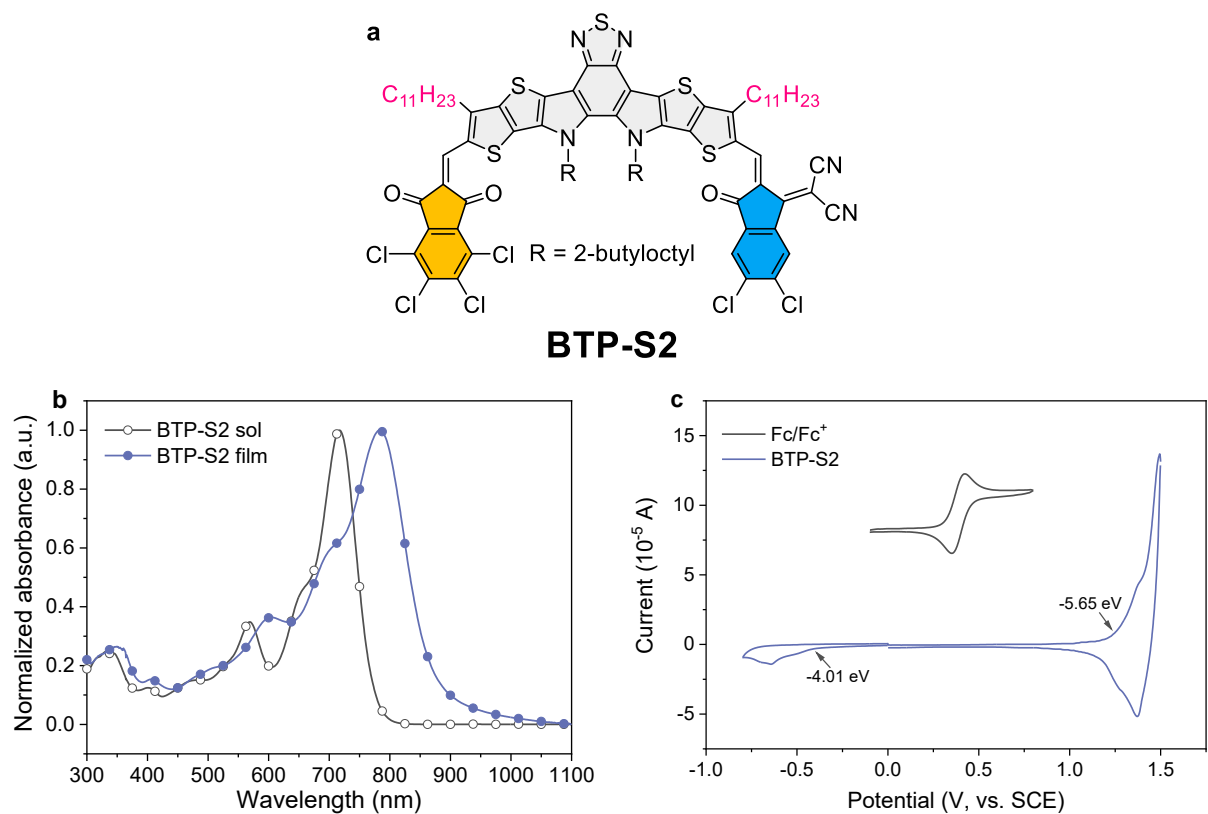

**Fig. S35** (a) Chemical structure of BTP-S2. (b) Absorption spectra of BTP-S2 solution and film. (c) Cyclic voltammograms of BTP-S2.

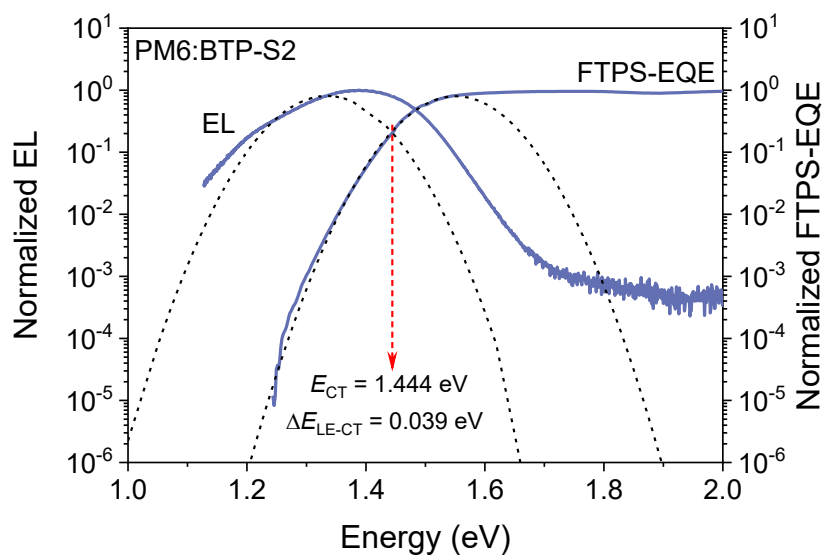

**Fig. S36** Semilogarithmic plots of normalized EL and normalized FTPS-EQE (solid lines), and the determination of  $E_{CT}$  via Gaussian fits to EL and FTPS-EQE spectra according to the Marcus equation (dash lines) for PM6:BTP-S2-based device.

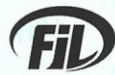

福建省计量科学研究院  
FUJIAN METROLOGY INSTITUTE  
(国家光伏产业计量测试中心)  
National PV Industry Measurement and Testing Center

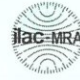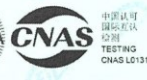

# 检测报告

## Test Report

报告编号: 22Q3-00207  
Report No.

|                              |                                    |
|------------------------------|------------------------------------|
| 客户名称<br>Name of Customer     | Zhejiang University                |
| 联络信息<br>Contact Information  | Hangzhou, Zhejiang Province, China |
| 物品名称<br>Name of Items        | Organic Photovoltaics              |
| 型号/规格<br>Type /Specification | Non-fullerene OPV                  |
| 物品编号<br>Items No             | No. 16                             |
| 制造厂商<br>Manufacturer         | Zhejiang University                |
| 物品接收日期<br>Items Receipt Date | 2022-10-21                         |
| 检测日期<br>Test Date            | 2022-10-26                         |

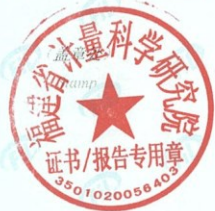

|                    |  |     |
|--------------------|--|-----|
| 批准人<br>Approved by |  | 蔡健生 |
| 核验员<br>Checked by  |  | 何翔  |
| 检测员<br>Test by     |  | 陈彩云 |

发布日期 2022 年 11 月 14 日  
Date of Report Year month Day

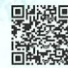

扫一扫 查真伪

|                                                                     |                                     |                                      |                         |
|---------------------------------------------------------------------|-------------------------------------|--------------------------------------|-------------------------|
| 本院/本中心地址: 福州市屏东路 9-3 号<br>Address: 9-3 Pingdong Road, Fuzhou, China | 电话: 0591-87845050<br>Telephone      | 传真: 0591-87808417<br>Fax             | 邮编: 350003<br>Post Code |
| 网址: www.fjil.net<br>Web Site                                        | 咨询电话: 0591-87845050<br>Inquire line | 投诉电话: 0591-87823025<br>Complaint Tel |                         |

未经本院/本中心书面批准, 部分复制采用本报告内容无效。  
Party using this Report will not be admitted unless allowed by FMI/ Center.

**Fig. S37** The copy of certified report from National PV Industry Measurement and Testing Center (NPVIM) for quaternary device (PM6:TAA-1 based quaternary OPV).

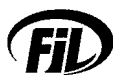

1. 检测机构说明:

Testing institutions that

本院为国家法定计量检定机构, 国家光伏产业计量测试中心依托本院检测技术开展检测。本院/本中心质量管理体系符合 GB/T 27025 (ISO/IEC 17025, IDT) 标准要求。

The Institute is a national legal metrological institution. National PV Industry Measurement and Testing Center carries out testing relying on the institute's testing technology. The Center's quality management system meets the requirements of GB/T 27025 (ISO/IEC 17025, IDT) standard.

2. 本次检测所依据的检测方法(代号及名称):

Reference documents from the test (code.name)

IEC 60904-1-2020 光伏器件-第一部分: 光伏电流-电压特性的测量; IEC 60904-8:2014 光伏器件-第8部分光伏器件的光谱响应度测量

3. 本次检测所使用的主要测量仪器:

Measurement standards used in this test

| 仪器名称<br>Name     | 仪器编号<br>Number    | 测量范围<br>Measuring Range                                                     | 不确定度/或准确度等级/或最大允许误差<br>Uncertainty or Accuracy Class or Maximum Permissible Error                                                                                                                                  | 溯源机构名称/证书编号<br>Name of traceability Institution/Certificate No. | 有效期至<br>Due date |
|------------------|-------------------|-----------------------------------------------------------------------------|--------------------------------------------------------------------------------------------------------------------------------------------------------------------------------------------------------------------|-----------------------------------------------------------------|------------------|
| 源表               | 10807C008<br>78-2 | 电流: $-10 \mu\text{A} \sim 1\text{A}$ ; 电压:<br>$20\text{mV} \sim 20\text{V}$ | 测量: DCV: $U_{rel}=0.05\%$ , $k=2$ ; DCI:<br>$U_{rel}=0.05\%$ , $k=2$<br>输出: DCV: $U_{rel}=0.05\%$ , $k=2$ ; DCI:<br>$U_{rel}=0.05\%$ , $k=2$                                                                       | 福建计量院<br>22D2-01826                                             | 2023-04-13       |
| 太阳模拟器            | 2015-006          | (300~1200)<br>nm; (800~<br>1200) $\text{W}/\text{m}^2$                      | 光谱匹配度(300~310) nm: $U_{rel}=7.4\%$<br>( $k=2$ ); (310~400) nm: $U_{rel}=6.4\%$<br>( $k=2$ ); (400~1200) nm: $U_{rel}=5.5\%$ ( $k=2$ ); 辐<br>照度比 $U_{rel}=1.2\%$ ( $k=2$ )                                          | 福建计量院<br>22Q2-00720                                             | 2023-06-16       |
| WPVS 单晶<br>硅标准电池 | 015-2014          | (300~1200)<br>nm                                                            | $U_{rel}=1.3\%$ ( $k=2$ )                                                                                                                                                                                          | 中国计量院<br>GXgf2021-10725                                         | 2023-04-05       |
| Si 光电探测<br>器     | Si-2              | (300~<br>1100)nm                                                            | (300~400)nm $U_{rel}=1.8\% \sim 1.7\%$ ( $k=2$ );<br>(400~450)nm $U_{rel}=1.7\% \sim 1.3\%$ ( $k=2$ );<br>(450~1000)nm $U_{rel}=1.3\% \sim 1.2\%$ ( $k=2$ );<br>(1000~1100)nm $U_{rel}=1.2\% \sim 1.7\%$ ( $k=2$ ) | 中国计量院<br>GXgf2021-10903                                         | 2023-03-24       |
| 数字温度计            | 15-B              | (15~65) $^{\circ}\text{C}$                                                  | $U=0.060 \text{ }^{\circ}\text{C}$ ( $k=2$ )                                                                                                                                                                       | 福建计量院<br>22B2-07588                                             | 2023-06-20       |

4. 检测地点及环境条件:

Location and environmental condition for the test

地点: Room 108, Building 4, MinHou Scientific Research Base

Location

温度:  $24.8 \text{ }^{\circ}\text{C}$

Temperature

相对湿度: 39%

Relative Humidity

其它: /

Others

5. 备注: /

Note

本报告提供的结果仅对本次被检的物品有效。

The data are valid only for the instrument(s) under testing.

检测报告续页专用

Continued page of test report

Fig. S37-continued The copy of certified report from National PV Industry Measurement and Testing Center (NPVIM) for quaternary device (PM6:TAA-1 based quaternary OPV).



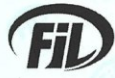

检测结果/说明:

Results of Test and Additional Explanation.

- 1 Standard Test Condition (STC): Total Irradiance: 1000 W/m<sup>2</sup>  
Temperature: 25.0 °C  
Spectral Distribution: AM1.5G

- 2 Measurement Data and I-V/P-V Curves under STC

Forward Scan

| $I_{sc}$ (mA) | $V_{oc}$ (V) | $I_{MPP}$ (mA) | $V_{MPP}$ (V) | $P_{MPP}$ (mW) | FF (%) | $\eta$ (%) |
|---------------|--------------|----------------|---------------|----------------|--------|------------|
| 1.255         | 0.8842       | 1.159          | 0.7591        | 0.8798         | 79.28  | 19.24      |

Reverse Scan

| $I_{sc}$ (mA) | $V_{oc}$ (V) | $I_{MPP}$ (mA) | $V_{MPP}$ (V) | $P_{MPP}$ (mW) | FF (%) | $\eta$ (%) |
|---------------|--------------|----------------|---------------|----------------|--------|------------|
| 1.257         | 0.8849       | 1.156          | 0.7626        | 0.8816         | 79.26  | 19.28      |

Mismatch Factor: 0.9927

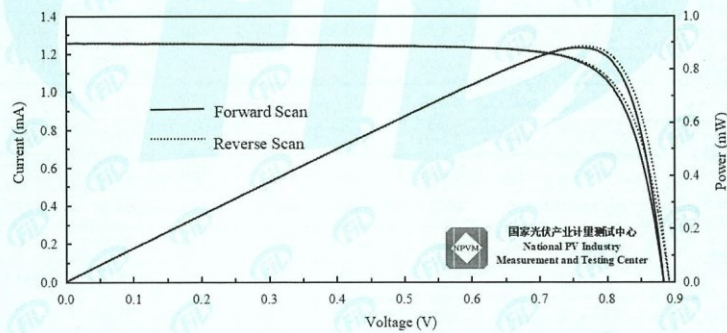

Figure 1. I-V and P-V characteristic curves of the measured sample under STC

**Fig. S37-continued** The copy of certified report from National PV Industry Measurement and Testing Center (NPVIM) for quaternary device (PM6:TAA-1 based quaternary OPV).

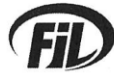

检测结果/说明:

Results of Test and Additional Explanation.

3 Measurement Data and Curve of Relative Spectral Responsivity (SR) of the Measured Sample

| Wavelength (nm) | SR(%)  |
|-----------------|-------|-----------------|-------|-----------------|-------|-----------------|-------|-----------------|--------|
| 300             | 1.27  | 425             | 45.64 | 550             | 73.32 | 675             | 89.09 | 800             | 100.00 |
| 305             | 2.09  | 430             | 47.67 | 555             | 74.37 | 680             | 89.82 | 805             | 99.87  |
| 310             | 3.09  | 435             | 49.26 | 560             | 75.39 | 685             | 90.59 | 810             | 99.59  |
| 315             | 4.36  | 440             | 50.48 | 565             | 76.32 | 690             | 91.25 | 815             | 99.09  |
| 320             | 6.08  | 445             | 51.38 | 570             | 77.12 | 695             | 91.74 | 820             | 98.40  |
| 325             | 8.29  | 450             | 52.10 | 575             | 77.83 | 700             | 92.21 | 825             | 97.97  |
| 330             | 10.67 | 455             | 52.76 | 580             | 78.43 | 705             | 92.68 | 830             | 97.26  |
| 335             | 12.77 | 460             | 53.42 | 585             | 79.14 | 710             | 93.09 | 835             | 96.05  |
| 340             | 14.47 | 465             | 54.21 | 590             | 79.81 | 715             | 93.66 | 840             | 94.09  |
| 345             | 15.85 | 470             | 55.11 | 595             | 80.44 | 720             | 94.17 | 845             | 91.85  |
| 350             | 16.92 | 475             | 56.05 | 600             | 81.00 | 725             | 94.87 | 850             | 88.88  |
| 355             | 17.74 | 480             | 57.02 | 605             | 81.10 | 730             | 95.42 | 855             | 84.79  |
| 360             | 18.52 | 485             | 58.10 | 610             | 80.87 | 735             | 95.80 | 860             | 80.31  |
| 365             | 19.90 | 490             | 59.26 | 615             | 81.14 | 740             | 96.20 | 865             | 75.40  |
| 370             | 20.98 | 495             | 60.40 | 620             | 81.55 | 745             | 96.73 | 870             | 69.70  |
| 375             | 21.75 | 500             | 61.59 | 625             | 82.02 | 750             | 97.27 | 875             | 63.18  |
| 380             | 22.61 | 505             | 62.86 | 630             | 82.58 | 755             | 97.67 | 880             | 56.46  |
| 385             | 24.05 | 510             | 64.07 | 635             | 83.15 | 760             | 97.98 | 885             | 50.92  |
| 390             | 26.10 | 515             | 65.34 | 640             | 83.70 | 765             | 98.31 | 890             | 46.40  |
| 395             | 28.61 | 520             | 66.62 | 645             | 84.34 | 770             | 98.70 | 895             | 39.38  |
| 400             | 31.48 | 525             | 67.81 | 650             | 85.11 | 775             | 98.88 | 900             | 32.38  |
| 405             | 34.54 | 530             | 68.96 | 655             | 85.90 | 780             | 99.07 | 905             | 27.01  |
| 410             | 37.62 | 535             | 70.09 | 660             | 86.70 | 785             | 99.36 | 910             | 22.24  |
| 415             | 40.52 | 540             | 71.21 | 665             | 87.58 | 790             | 99.58 | 915             | 17.84  |
| 420             | 43.22 | 545             | 72.28 | 670             | 88.36 | 795             | 99.87 | 920             | 13.66  |

福建省  
证

检测报告续页专用  
Continued page of test report

Fig. S37-continued The copy of certified report from National PV Industry Measurement and Testing Center (NPVIM) for quaternary device (PM6:TAA-1 based quaternary OPV).

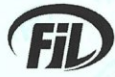

检测结果/说明:

Results of Test and Additional Explanation.

| Wavelength (nm) | SR(%) |
|-----------------|-------|-----------------|-------|-----------------|-------|-----------------|-------|-----------------|-------|
| 925             | 11.28 | 945             | 3.91  | 965             | 1.46  | 985             | 0.44  | /               | /     |
| 930             | 9.09  | 950             | 3.10  | 970             | 1.13  | 990             | 0.37  | /               | /     |
| 935             | 6.95  | 955             | 2.41  | 975             | 0.83  | 995             | 0.29  | /               | /     |
| 940             | 5.11  | 960             | 1.85  | 980             | 0.58  | 1000            | 0.22  | /               | /     |

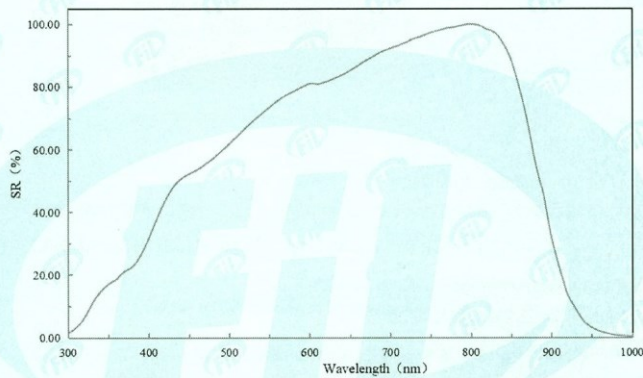

Figure 2. Relative spectral responsivity curve of the measured sample

4 Pictures of the Measured Sample

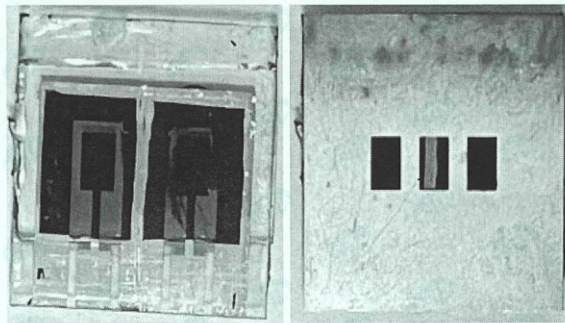

Figure 3. Mask used during test and obverse side of the sample

检测报告续页专用  
Continued page of test report

**Fig. S37-continued** The copy of certified report from National PV Industry Measurement and Testing Center (NPVIM) for quaternary device (PM6:TAA-1 based quaternary OPV).

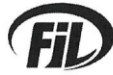

检测结果/说明:  
Results of Test and Additional Explanation.

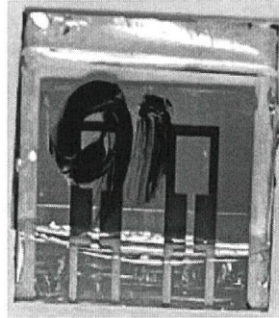

Figure 4. Reverse side of the measured sample

Uncertainty of Measurement Results:

Short-Circuit Current:  $U_{rel}=1.8\%$  ( $k=2$ ); Open-Circuit Voltage:  $U_{rel}=1.0\%$  ( $k=2$ );

Maximum Power:  $U_{rel}=2.2\%$  ( $k=2$ ); Efficiency:  $U_{rel}=2.2\%$  ( $k=2$ ); Fill Factor:  $U_{rel}=3.2\%$  ( $k=2$ ).

Relative Spectral Responsivity:

(300-400) nm:  $U_{rel} = 2.2\%$  ( $k=2$ );

(400-1000) nm:  $U_{rel} = 1.8\%$  ( $k=2$ );

说明: The designated illuminated area of the measured sample was 0.04572 cm<sup>2</sup>.

Explanation

计量科  
书骑

| Testing Method (Code and Name) for This Test                                                                       |
|--------------------------------------------------------------------------------------------------------------------|
| IEC 60904-1: 2020 Photovoltaic devices- Part 1: Measurement of photovoltaic current-voltage characteristics        |
| IEC 60904-8: 2014 Photovoltaic devices- Part 8: Measurement of spectral responsivity of a photovoltaic (PV) device |

检测报告续页专用  
Continued page of test report

**Fig. S37-continued** The copy of certified report from National PV Industry Measurement and Testing Center (NPVIM) for quaternary device (PM6:TAA-1 based quaternary OPV).

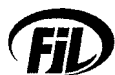

检测结果/说明:

Results of Test and Additional Explanation.

| Measurement Standards Used in This Test              |                   |                                                   |                                                                                                                                                                                                                   |                                                       |            |
|------------------------------------------------------|-------------------|---------------------------------------------------|-------------------------------------------------------------------------------------------------------------------------------------------------------------------------------------------------------------------|-------------------------------------------------------|------------|
| Name                                                 | Number            | Measuring Range                                   | Uncertainty or Accuracy Class or Maximum Permissible Error                                                                                                                                                        | Name of Traceability Institution/Certificate No.      | Due Date   |
| SourceMeter                                          | 10807C0087<br>8-2 | DCI:<br>(-10 $\mu$ A~1A);<br>DCV:<br>(20mV~20V)   | Measure: DCV: $U_{rel}=0.05\%,k=2$ ; DCI:<br>$U_{rel}=0.05\%,k=2$<br>Output: DCV: $U_{rel}=0.05\%,k=2$ ; DCI:<br>$U_{rel}=0.05\%,k=2$                                                                             | Fujian Metrology Institute/<br>22D2-01826             | 2023-04-13 |
| Solar Simulator                                      | 2015-006          | (300~1200)<br>nm; (800~<br>1200) W/m <sup>2</sup> | Spectral Match: (300~310)<br>nm: $U_{rel}=7.4\% (k=2)$ ; (310~<br>400) nm: $U_{rel}=6.4\%$<br>( $k=2$ ); (400~1200) nm:<br>$U_{rel}=5.5\% (k=2)$ ; Irradiance<br>Ratio: $U_{rel}=1.2\% (k=2)$                     | Fujian Metrology Institute/<br>22Q2-00720             | 2023-06-16 |
| WPVS<br>Monocrystalline<br>Silicon<br>Reference Cell | 015-2014          | (300~1200)<br>nm                                  | $U_{rel}=1.3\% (k=2)$                                                                                                                                                                                             | National Institute of<br>Metrology/<br>GXgf2021-10725 | 2023-04-05 |
| Si Photoelectric<br>Detector                         | Si-2              | (300~1100)<br>nm                                  | (300~400) nm $U_{rel}=1.8\% \sim 1.7%$<br>( $k=2$ ); (400~450) nm $U_{rel}=1.7\% \sim$<br>1.3% ( $k=2$ ); (450~1000) nm<br>$U_{rel}=1.3\% \sim 1.2\% (k=2)$ ; (1000~<br>1100) nm $U_{rel}=1.2\% \sim 1.7\% (k=2)$ | National Institute of<br>Metrology/<br>GXgf2021-10903 | 2023-03-24 |
| Digital<br>Thermometer                               | 15-B              | (15~65) $^{\circ}$ C                              | $U=0.060\text{ }^{\circ}$ C ( $k=2$ )                                                                                                                                                                             | Fujian Metrology<br>Institute/22B2-07588              | 2023-06-20 |

以下空白  
Blank below

检测报告续页专用  
Continued page of test report

第 7 页/共 7 页  
Page of Pages

Fig. S37-continued The copy of certified report from National PV Industry Measurement and Testing Center (NPVIM) for quaternary device (PM6:TAA-1 based quaternary OPV).

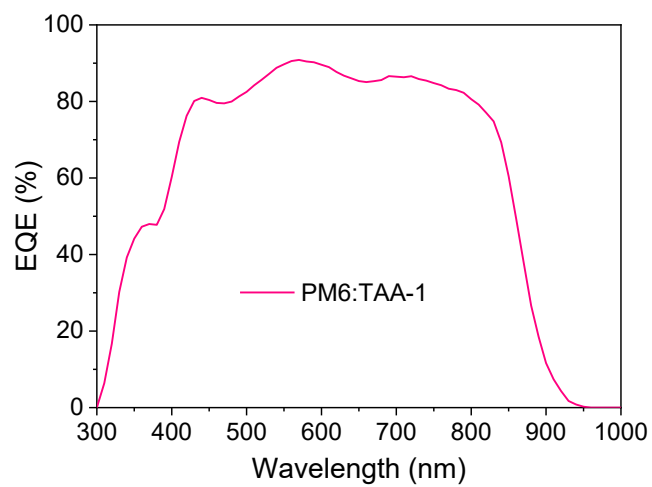

**Fig. S38** EQE curve of device based on PM6:TAA-1 blend (TAA-1: BTP-S11:BTP-S12:BTP-S2 = 0.7:0.3:0.2).

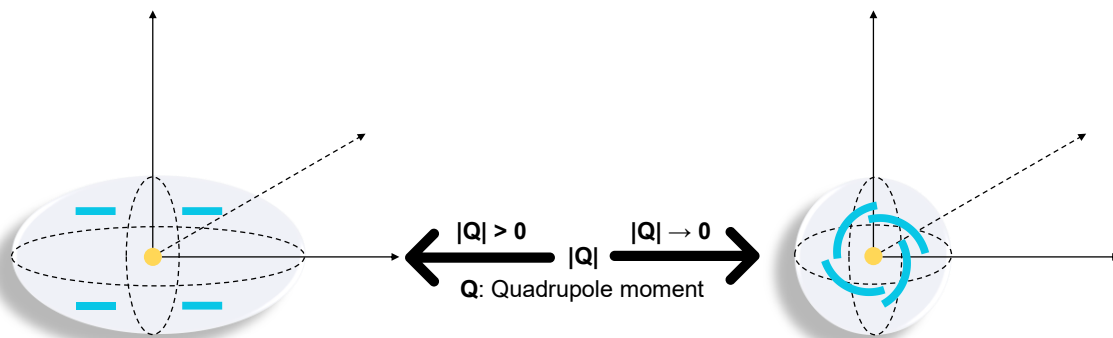

**Fig. S39** Diagram of varied quadrupole moments with increased straight-crystal or curved-crystal.

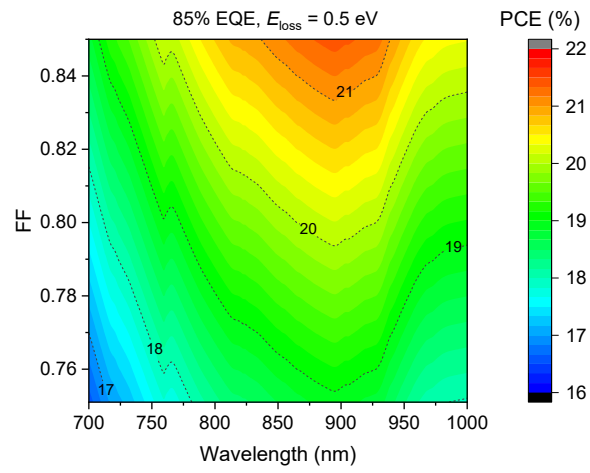

**Fig. S40** Efficiency potentials of OPVs with the change of FF.



## Supplementary Tables

**Table S1** Summary of photovoltaic parameters of binary and ternary OPVs for this work and reported references

| Device type | Active layer                | $V_{oc}$ (V) | $J_{sc}$ (mA cm <sup>-2</sup> ) | FF (%) | $V_{oc} * J_{sc}$ | PCE (%) | Ref.      |
|-------------|-----------------------------|--------------|---------------------------------|--------|-------------------|---------|-----------|
| Binary      | PM6:BTP-S11                 | 0.878        | 27.1                            | 79.3   | 23.79             | 18.9    | This work |
|             | PM6:Y6                      | 0.830        | 25.3                            | 74.8   | 21.00             | 15.7    | 1         |
|             | PM6:BTP-4Cl                 | 0.867        | 25.4                            | 75.0   | 22.02             | 16.5    | 2         |
|             | PM6:BO-4Cl                  | 0.858        | 25.6                            | 77.6   | 21.96             | 17.0    | 3         |
|             | PM6:BTP-4F-12               | 0.855        | 25.3                            | 76.0   | 21.63             | 16.4    | 4         |
|             | PM6:N3                      | 0.837        | 25.8                            | 73.9   | 21.59             | 16.0    | 5         |
|             | PM6:BTP-eC9                 | 0.839        | 26.2                            | 81.1   | 21.98             | 17.8    | 6         |
|             | PM6:BTP-S2                  | 0.945        | 24.1                            | 72.0   | 22.77             | 16.4    | 7         |
|             | PM6:AQx-2                   | 0.860        | 25.4                            | 76.3   | 21.84             | 16.6    | 8         |
|             | PM6:BTIC-2Br-m              | 0.880        | 25.0                            | 73.1   | 22.00             | 16.1    | 9         |
|             | PM6:DTY6                    | 0.858        | 25.3                            | 75.4   | 21.71             | 16.3    | 10        |
|             | PM6:BTIC-CF <sub>3</sub> -g | 0.850        | 25.2                            | 72.8   | 21.42             | 15.6    | 11        |
|             | PM6:BTP-2F-ThCl             | 0.869        | 25.4                            | 77.4   | 22.07             | 17.1    | 12        |
|             | PM6:Y6-O                    | 0.940        | 22.9                            | 77.0   | 21.53             | 16.5    | 13        |
|             | PM6:Y11                     | 0.833        | 26.7                            | 74.3   | 22.24             | 16.5    | 14        |
|             | PM6:mBzS-4F                 | 0.804        | 27.7                            | 76.4   | 22.27             | 17.0    | 15        |
|             | PM6:BTP-4F-P2EH             | 0.880        | 25.9                            | 80.1   | 22.79             | 18.2    | 16        |
|             | PM6:A-WSSe-Cl               | 0.850        | 26.6                            | 77.5   | 22.61             | 17.5    | 17        |
|             | PM6:BT-BO-L4F               | 0.830        | 28.4                            | 70.3   | 23.57             | 16.6    | 18        |
|             | PM6:BTP-S9                  | 0.846        | 26.5                            | 78.4   | 22.42             | 17.6    | 19        |
|             | PM6:L8-BO                   | 0.870        | 25.7                            | 81.5   | 22.36             | 18.3    | 20        |
|             | PM6:EH-HD-4F                | 0.840        | 27.5                            | 79.3   | 23.10             | 18.4    | 21        |
|             | PTQ10:Y6                    | 0.870        | 24.8                            | 75.1   | 21.58             | 16.2    | 22        |
|             | Pt10:Y6                     | 0.810        | 26.5                            | 76.3   | 21.47             | 16.4    | 23        |
|             | P2F-EHp:Y6                  | 0.810        | 26.7                            | 74.1   | 21.63             | 16.0    | 24        |
|             | PM6-Ir1:Y6                  | 0.845        | 26.2                            | 78.4   | 22.14             | 17.3    | 25        |
|             | PBTT-F:Y6                   | 0.840        | 24.8                            | 77.1   | 20.83             | 16.1    | 26        |
|             | PTQ11:TPT10                 | 0.880        | 24.8                            | 74.8   | 21.82             | 16.3    | 27        |
|             | D18:Y6Se                    | 0.839        | 28.0                            | 75.3   | 23.49             | 17.7    | 28        |
|             | PT2:Y6                      | 0.830        | 26.7                            | 74.4   | 22.16             | 16.5    | 29        |
|             | PM1:Y6                      | 0.870        | 25.9                            | 78.0   | 22.53             | 17.6    | 30        |
|             | D18:Y6                      | 0.859        | 27.7                            | 76.6   | 23.79             | 18.2    | 31        |
|             | PM7:Y6                      | 0.897        | 25.6                            | 74.0   | 22.96             | 17.0    | 32        |
|             | PBTATBT-4f:Y6               | 0.810        | 27.3                            | 72.7   | 22.11             | 16.1    | 33        |
|             | SZ4:N3                      | 0.848        | 26.0                            | 77.4   | 22.05             | 16.7    | 34        |

|                                      |              |             |             |              |             |                  |
|--------------------------------------|--------------|-------------|-------------|--------------|-------------|------------------|
| PBQ10:Y6                             | 0.850        | 25.8        | 74.6        | 21.93        | 16.3        | 35               |
| P5T:BTP-eC9                          | 0.837        | 26.5        | 79.8        | 22.18        | 17.7        | 36               |
| PBQ6:Y6                              | 0.851        | 26.6        | 77.9        | 22.64        | 17.6        | 37               |
| PM6-Tz20:Y6                          | 0.860        | 27.3        | 75.0        | 23.48        | 17.6        | 38               |
| PBNT-BDD:Y6                          | 0.880        | 25.4        | 72.0        | 22.35        | 16.1        | 39               |
| PTVT-T:BTP-eC9                       | 0.790        | 26.2        | 78.0        | 20.70        | 16.2        | 40               |
| PBDB-T:PN-Se                         | 0.907        | 24.8        | 71.8        | 22.49        | 16.2        | 41               |
| D18:BO-4Cl                           | 0.860        | 26.3        | 77.7        | 22.62        | 17.6        | 42               |
| PTQ10:m-BTP-C6Ph                     | 0.883        | 25.3        | 79.3        | 22.34        | 17.7        | 43               |
| PNTB6-Cl:N3                          | 0.857        | 26.6        | 77.3        | 22.80        | 17.6        | 44               |
| PBCT-2F:Y6                           | 0.850        | 27.2        | 74.3        | 23.12        | 17.1        | 45               |
| <b>Ternary PM6:DAA-4</b>             | <b>0.880</b> | <b>27.1</b> | <b>79.9</b> | <b>23.85</b> | <b>19.1</b> | <b>This work</b> |
| PM6:Y6:PC <sub>71</sub> BM           | 0.850        | 25.8        | 74.7        | 21.93        | 16.4        | 46               |
| PM6:Y6:BTTPC                         | 0.860        | 25.5        | 77.0        | 21.93        | 16.8        | 47               |
| PM6:Y6:BTP-M                         | 0.875        | 26.6        | 73.5        | 23.28        | 17.0        | 48               |
| PM6:Y18:PC <sub>71</sub> BM          | 0.840        | 26.3        | 77.4        | 22.09        | 17.1        | 49               |
| PM6:CH1007:PC <sub>71</sub> BM       | 0.822        | 27.5        | 75.6        | 22.61        | 17.1        | 50               |
| PM6:BTP-4F-12:MeIC                   | 0.863        | 25.4        | 79.2        | 21.92        | 17.4        | 51               |
| PM6:PB2F:BTP-eC9                     | 0.863        | 26.8        | 80.4        | 23.13        | 18.6        | 52               |
| D18-Cl:Y6:PC <sub>71</sub> BM        | 0.870        | 26.8        | 77.0        | 23.32        | 18.0        | 53               |
| D18-Cl:Y6:Y6-1O                      | 0.900        | 25.9        | 76.9        | 23.31        | 17.9        | 54               |
| PM6:CH1007:BT-4BO                    | 0.880        | 26.9        | 75.4        | 23.67        | 17.8        | 55               |
| PTQ10:BTP-Ph:BTP-Th                  | 0.888        | 25.2        | 78.6        | 22.38        | 17.6        | 56               |
| PM6:Y6-1O:PC <sub>71</sub> BM        | 0.900        | 24.9        | 78.5        | 22.41        | 17.6        | 57               |
| PTQ10:m-BTP-PhC6:PC <sub>71</sub> BM | 0.869        | 27.0        | 80.6        | 23.46        | 18.9        | 58               |
| PM6:BTP-eC9:L8-BO-F                  | 0.853        | 27.4        | 80.0        | 23.37        | 18.7        | 59               |
| PBQx-TF:eC9-2Cl:F-BTA3               | 0.879        | 26.7        | 80.9        | 23.47        | 19.0        | 60               |
| PBQx-TCl:BTP-eC9:BTA3                | 0.840        | 26.9        | 79.6        | 22.60        | 18.0        | 61               |
| PM6:BO-4Cl:BTP-S2                    | 0.861        | 27.1        | 78.0        | 23.33        | 18.2        | 62               |
| D18:Y6:BTTPR                         | 0.863        | 27.8        | 74.6        | 23.99        | 17.8        | 63               |
| PM6:BTP-eC9:BTP-F                    | 0.858        | 27.0        | 79.7        | 23.17        | 18.5        | 64               |
| B1:BO-4Cl:BO-2Cl                     | 0.840        | 26.1        | 78.0        | 21.92        | 17.0        | 65               |
| PM6:eC9:HDO-4Cl                      | 0.866        | 27.1        | 80.5        | 23.47        | 18.9        | 66               |
| D18-Cl:Y6:G19                        | 0.871        | 27.4        | 77.7        | 23.87        | 18.5        | 67               |
| PM6:PYT:PY2F-T                       | 0.900        | 25.2        | 76.0        | 22.68        | 17.2        | 68               |
| PNTB-2T:Y6:PC <sub>71</sub> BM       | 0.875        | 26.5        | 75.0        | 23.19        | 17.4        | 69               |

**Table S2** Summary of hole and electron mobilities for binary and ternary devices

| Active layer | $\mu_h (\times 10^{-3} \text{ cm}^2 \text{ V}^{-1} \text{ s}^{-1})$ | $\mu_e (\times 10^{-3} \text{ cm}^2 \text{ V}^{-1} \text{ s}^{-1})$ | $\mu_h / \mu_e$ |
|--------------|---------------------------------------------------------------------|---------------------------------------------------------------------|-----------------|
| PM6:BTP-S11  | 2.45±0.42                                                           | 2.62±1.12                                                           | 0.94            |
| PM6:BTP-S12  | 1.09±0.18                                                           | 0.33±0.15                                                           | 3.30            |
| PM6:BTP-S9   | 2.91±0.41                                                           | 3.53±2.06                                                           | 0.82            |
| PM6:DAA-1    | 2.30±0.33                                                           | 2.96±1.65                                                           | 0.78            |
| PM6:DAA-2    | 1.61±0.43                                                           | 2.46±1.23                                                           | 0.65            |
| PM6:DAA-3    | 1.66±0.28                                                           | 2.46±0.39                                                           | 0.67            |
| PM6:DAA-4    | 2.40±0.38                                                           | 3.19±0.33                                                           | 0.75            |

**Table S3** Summary of miscibility and aggregation parameters

| Material | $\theta_{\text{water}} (^\circ)$ | $\theta_{\text{diiodomethane}} (^\circ)$ | $\gamma^d (\text{mN m}^{-1})^a$ | $\gamma^h (\text{mN m}^{-1})^b$ | $\gamma (\text{mN m}^{-1})^c$ | $\chi^{D-A d}$ | $R_q (\text{nm})$ |
|----------|----------------------------------|------------------------------------------|---------------------------------|---------------------------------|-------------------------------|----------------|-------------------|
| PM6      | 105.41                           | 58.60                                    | 1.33                            | 48.97                           | 50.30                         | /              | 0.99              |
| BTP-S11  | 94.31                            | 46.82                                    | 3.08                            | 55.33                           | 58.41                         | 0.30           | 0.55              |
| BTP-S12  | 91.78                            | 45.78                                    | 3.70                            | 54.67                           | 58.37                         | 0.30           | 1.78              |
| BTP-S9   | 94.28                            | 42.91                                    | 2.87                            | 59.65                           | 62.52                         | 0.66           | 0.57              |
| DAA-1    | 94.86                            | 44.62                                    | 2.81                            | 58.20                           | 61.01                         | 0.52           | 0.67              |
| DAA-2    | 95.55                            | 46.85                                    | 2.76                            | 56.20                           | 58.96                         | 0.34           | 0.69              |
| DAA-3    | 95.47                            | 46.48                                    | 2.76                            | 56.56                           | 59.32                         | 0.37           | 0.52              |

<sup>a</sup> Surface tension from dipole-dipole component.

<sup>b</sup> Surface tension from hydrogen bond component.

<sup>c</sup> The total surface tension is calculated through the equation of  $\gamma = \gamma^d + \gamma^h$ .

<sup>d</sup> The Flory-Huggins interaction parameter between the donor (D) and acceptor (A) is calculated with the equation of  $\chi^{D-A} = (\sqrt{\gamma_D} - \sqrt{\gamma_A})^2$ .

**Table S4** Summary of  $\Delta IP$ ,  $\Delta E_{LE-CT}$ ,  $B$ ,  $\Delta E_3$  and  $EQE_{EL}$  parameters for binary and ternary systems

| Active Layer | $\Delta IP$ (eV) | $\Delta E_{LE-CT}$ (eV) | $B$ (eV) | $\Delta E_3$ (eV) | $EQE_{EL}$ ( $10^{-2}\%$ ) |
|--------------|------------------|-------------------------|----------|-------------------|----------------------------|
| PM6:BTP-S11  | 0.49             | 0.051                   | 0.439    | 0.194             | 4.12                       |
| PM6:BTP-S12  | 0.47             | 0.052                   | 0.418    | 0.210             | 3.12                       |
| PM6:BTP-S9   | 0.32             | 0.041                   | 0.279    | 0.201             | 3.17                       |
| PM6:DAA-1    | 0.53             | 0.053                   | 0.477    | 0.179             | 8.67                       |
| PM6:DAA-2    | 0.36             | 0.046                   | 0.314    | 0.190             | 6.38                       |
| PM6:DAA-3    | 0.26             | 0.043                   | 0.217    | 0.199             | 3.62                       |

## Supplementary References

- 1 J. Yuan, Y. Zhang, L. Zhou, G. Zhang, H.-L. Yip, T.-K. Lau, X. Lu, C. Zhu, H. Peng, P. A. Johnson, M. Leclerc, Y. Cao, J. Ulanski, Y. Li and Y. Zou, *Joule*, 2019, **3**, 1140-1151.
- 2 Y. Cui, H. Yao, J. Zhang, T. Zhang, Y. Wang, L. Hong, K. Xian, B. Xu, S. Zhang, J. Peng, Z. Wei, F. Gao and J. Hou, *Nat. Commun.*, 2019, **10**, 2515.
- 3 Y. Cui, H. Yao, L. Hong, T. Zhang, Y. Tang, B. Lin, K. Xian, B. Gao, C. An, P. Bi, W. Ma and J. Hou, *Natl. Sci. Rev.*, 2019, **7**, 1239-1246.
- 4 L. Hong, H. Yao, Z. Wu, Y. Cui, T. Zhang, Y. Xu, R. Yu, Q. Liao, B. Gao, K. Xian, H. Y. Woo, Z. Ge and J. Hou, *Adv. Mater.*, 2019, **31**, 1903441.
- 5 K. Jiang, Q. Wei, J. Y. L. Lai, Z. Peng, H. K. Kim, J. Yuan, L. Ye, H. Ade, Y. Zou and H. Yan, *Joule*, 2019, **3**, 3020-3033.
- 6 Y. Cui, H. Yao, J. Zhang, K. Xian, T. Zhang, L. Hong, Y. Wang, Y. Xu, K. Ma, C. An, C. He, Z. Wei, F. Gao and J. Hou, *Adv. Mater.*, 2020, **32**, 1908205.
- 7 S. Li, L. Zhan, Y. Jin, G. Zhou, T.-K. Lau, R. Qin, M. Shi, C.-Z. Li, H. Zhu, X. Lu, F. Zhang and H. Chen, *Adv. Mater.*, 2020, **32**, 2001160.
- 8 Z. Zhou, W. Liu, G. Zhou, M. Zhang, D. Qian, J. Zhang, S. Chen, S. Xu, C. Yang, F. Gao, H. Zhu, F. Liu and X. Zhu, *Adv. Mater.*, 2020, **32**, 1906324.
- 9 H. Wang, T. Liu, J. Zhou, D. Mo, L. Han, H. Lai, H. Chen, N. Zheng, Y. Zhu, Z. Xie and F. He, *Adv. Sci.*, 2020, **7**, 1903784.
- 10 S. Dong, T. Jia, K. Zhang, J. Jing and F. Huang, *Joule*, 2020, **4**, 2004-2016.
- 11 H. Lai, Q. Zhao, Z. Chen, H. Chen, P. Chao, Y. Zhu, Y. Lang, N. Zhen, D. Mo, Y. Zhang and F. He, *Joule*, 2020, **4**, 688-700.
- 12 Z. Luo, R. Ma, T. Liu, J. Yu, Y. Xiao, R. Sun, G. Xie, J. Yuan, Y. Chen, K. Chen, G. Chai, H. Sun, J. Min, J. Zhang, Y. Zou, C. Yang, X. Lu, F. Gao and H. Yan, *Joule*, 2020, **4**, 1236-1247.
- 13 L.-K. Ma, Y. Chen, P. C. Y. Chow, G. Zhang, J. Huang, C. Ma, J. Zhang, H. Yin, A. M. Hong Cheung, K. S. Wong, S. K. So and H. Yan, *Joule*, 2020, **4**, 1486-1500.
- 14 S. Liu, J. Yuan, W. Deng, M. Luo, Y. Xie, Q. Liang, Y. Zou, Z. He, H. Wu and Y. Cao, *Nat. Photonics*, 2020, **14**, 300-305.
- 15 F. Qi, K. Jiang, F. Lin, Z. Wu, H. Zhang, W. Gao, Y. Li, Z. Cai, H. Y. Woo, Z. Zhu and A. K. Y. Jen, *ACS Energy Lett.*, 2021, **6**, 9-15.
- 16 J. Zhang, F. Bai, I. Angunawela, X. Xu, S. Luo, C. Li, G. Chai, H. Yu, Y. Chen, H. Hu, Z. Ma, H. Ade and H. Yan, *Adv. Energy Mater.*, 2021, **11**, 2102596.
- 17 C. Yang, Q. An, H.-R. Bai, H.-F. Zhi, H. S. Ryu, A. Mahmood, X. Zhao, S. Zhang, H. Y. Woo and J.-L. Wang, *Angew. Chem. Int. Ed.*, 2021, **60**, 19241-19252.
- 18 G. Li, X. Zhang, L. O. Jones, J. M. Alzola, S. Mukherjee, L.-w. Feng, W. Zhu, C. L. Stern, W. Huang, J. Yu, V. K. Sangwan, D. M. DeLongchamp, K. L. Kohlstedt, M. R. Wasielewski, M. C. Hersam, G. C. Schatz, A. Facchetti and T. J. Marks, *J. Am. Chem. Soc.*, 2021, **143**, 6123-6139.
- 19 S. Li, L. Zhan, N. Yao, X. Xia, Z. Chen, W. Yang, C. He, L. Zuo, M. Shi, H. Zhu, X. Lu, F. Zhang and H. Chen, *Nat. Commun.*, 2021, **12**, 4627.
- 20 C. Li, J. Zhou, J. Song, J. Xu, H. Zhang, X. Zhang, J. Guo, L. Zhu, D. Wei, G. Han, J. Min, Y. Zhang, Z. Xie, Y. Yi, H. Yan, F. Gao, F. Liu and Y. Sun, *Nat. Energy*, 2021, **6**, 605-613.

- 21 S. Chen, L. Feng, T. Jia, J. Jing, Z. Hu, K. Zhang and F. Huang, *Sci. China Chem.*, 2021, **64**, 1192-1199.
- 22 C. Sun, F. Pan, S. Chen, R. Wang, R. Sun, Z. Shang, B. Qiu, J. Min, M. Lv, L. Meng, C. Zhang, M. Xiao, C. Yang and Y. Li, *Adv. Mater.*, 2019, **31**, 1905480.
- 23 X. Xu, K. Feng, Z. Bi, W. Ma, G. Zhang and Q. Peng, *Adv. Mater.*, 2019, **31**, 1901872.
- 24 B. Fan, D. Zhang, M. Li, W. Zhong, Z. Zeng, L. Ying, F. Huang and Y. Cao, *Sci. China Chem.*, 2019, **62**, 746-752.
- 25 T. Wang, R. Sun, M. Shi, F. Pan, Z. Hu, F. Huang, Y. Li and J. Min, *Adv. Energy Mater.*, 2020, **10**, 2000590.
- 26 P. Chao, H. Chen, Y. Zhu, H. Lai, D. Mo, N. Zheng, X. Chang, H. Meng and F. He, *Adv. Mater.*, 2020, **32**, 1907059.
- 27 C. Sun, S. Qin, R. Wang, S. Chen, F. Pan, B. Qiu, Z. Shang, L. Meng, C. Zhang, M. Xiao, C. Yang and Y. Li, *J. Am. Chem. Soc.*, 2020, **142**, 1465-1474.
- 28 Z. Zhang, Y. Li, G. Cai, Y. Zhang, X. Lu and Y. Lin, *J. Am. Chem. Soc.*, 2020, **142**, 18741-18745.
- 29 K. Weng, L. Ye, L. Zhu, J. Xu, J. Zhou, X. Feng, G. Lu, S. Tan, F. Liu and Y. Sun, *Nat. Commun.*, 2020, **11**, 2855.
- 30 J. Wu, G. Li, J. Fang, X. Guo, L. Zhu, B. Guo, Y. Wang, G. Zhang, L. Arunagiri, F. Liu, H. Yan, M. Zhang and Y. Li, *Nat. Commun.*, 2020, **11**, 4612.
- 31 Q. Liu, Y. Jiang, K. Jin, J. Qin, J. Xu, W. Li, J. Xiong, J. Liu, Z. Xiao, K. Sun, S. Yang, X. Zhang and L. Ding, *Sci. Bull.*, 2020, **65**, 272-275.
- 32 M. Ruijie, L. Tao, L. Zhenghui, G. Qing, X. Yiqun, C. Yuzhong, L. Xiaojun, L. Siwei, L. Xinhui, Z. Maojie, L. Yongfang and Y. He, *Sci. China Chem.*, 2020, **63**, 325-330.
- 33 L.-W. Feng, J. Chen, S. Mukherjee, V. K. Sangwan, W. Huang, Y. Chen, D. Zheng, J. W. Strzalka, G. Wang, M. C. Hersam, D. DeLongchamp, A. Facchetti and T. J. Marks, *ACS Energy Lett.*, 2020, **5**, 1780-1787.
- 34 J. Liang, M. Pan, G. Chai, Z. Peng, J. Zhang, S. Luo, Q. Han, Y. Chen, A. Shang, F. Bai, Y. Xu, H. Yu, J. Y. L. Lai, Q. Chen, M. Zhang, H. Ade and H. Yan, *Adv. Mater.*, 2020, **32**, 2003500.
- 35 C. Sun, F. Pan, B. Qiu, S. Qin, S. Chen, Z. Shang, L. Meng, C. Yang and Y. Li, *Chem. Mater.*, 2020, **32**, 3254-3261.
- 36 L. Ma, S. Zhang, J. Wang, J. Ren, M. Gao, J. Zhang, T. Zhang, H. Yao, L. Ye and J. Hou, *ACS Mater. Lett.*, 2021, **3**, 1276-1283.
- 37 C. Zhu, L. Meng, J. Zhang, S. Qin, W. Lai, B. Qiu, J. Yuan, Y. Wan, W. Huang and Y. Li, *Adv. Mater.*, 2021, **33**, 2100474.
- 38 X. Guo, Q. Fan, J. Wu, G. Li, Z. Peng, W. Su, J. Lin, L. Hou, Y. Qin, H. Ade, L. Ye, M. Zhang and Y. Li, *Angew. Chem. Int. Ed.*, 2021, **60**, 2322-2329.
- 39 S. Pang, Z. Wang, X. Yuan, L. Pan, W. Deng, H. Tang, H. Wu, S. Chen, C. Duan, F. Huang and Y. Cao, *Angew. Chem. Int. Ed.*, 2021, **60**, 8813-8817.
- 40 J. Ren, P. Bi, J. Zhang, J. Liu, J. Wang, Y. Xu, Z. Wei, S. Zhang and J. Hou, *Natl. Sci. Rev.*, 2021, **8**, nwab031.
- 41 J. Du, K. Hu, J. Zhang, L. Meng, J. Yue, I. Angunawela, H. Yan, S. Qin, X. Kong, Z. Zhang, B. Guan, H. Ade and Y. Li, *Nat. Commun.*, 2021, **12**, 5264.
- 42 H. Chen, T. Zhao, L. Li, P. Tan, H. Lai, Y. Zhu, X. Lai, L. Han, N. Zheng, L. Guo and F.

- He, *Adv. Mater.*, 2021, **33**, 2102778.
- 43 G. Chai, Y. Chang, J. Zhang, X. Xu, L. Yu, X. Zou, X. Li, Y. Chen, S. Luo, B. Liu, F. Bai, Z. Luo, H. Yu, J. Liang, T. Liu, K. S. Wong, H. Zhou, Q. Peng and H. Yan, *Energy Environ. Sci.*, 2021, **14**, 3469-3479.
- 44 H. Ning, Q. Jiang, P. Han, M. Lin, G. Zhang, J. Chen, H. Chen, S. Zeng, J. Gao, J. Liu, F. He and Q. Wu, *Energy Environ. Sci.*, 2021, **14**, 5919-5928.
- 45 X. Yuan, Y. Zhao, T. Zhan, J. Oh, J. Zhou, J. Li, X. Wang, Z. Wang, S. Pang, P. Cai, C. Yang, Z. He, Z. Xie, C. Duan, F. Huang and Y. Cao, *Energy Environ. Sci.*, 2021, **14**, 5530-5540.
- 46 T. Yan, W. Song, J. Huang, R. Peng, L. Huang and Z. Ge, *Adv. Mater.*, 2019, **31**, 1902210.
- 47 D. Wang, R. Qin, G. Zhou, X. Li, R. Xia, Y. Li, L. Zhan, H. Zhu, X. Lu, H.-L. Yip, H. Chen and C.-Z. Li, *Adv. Mater.*, 2020, **32**, 2001621.
- 48 L. Zhan, S. Li, T.-K. Lau, Y. Cui, X. Lu, M. Shi, C.-Z. Li, H. Li, J. Hou and H. Chen, *Energy Environ. Sci.*, 2020, **13**, 635-645.
- 49 C. Zhu, J. Yuan, F. Cai, L. Meng, H. Zhang, H. Chen, J. Li, B. Qiu, H. Peng, S. Chen, Y. Hu, C. Yang, F. Gao, Y. Zou and Y. Li, *Energy Environ. Sci.*, 2020, **13**, 2459-2466.
- 50 F. Lin, K. Jiang, W. Kaminsky, Z. Zhu and A. K. Y. Jen, *J. Am. Chem. Soc.*, 2020, **142**, 15246-15251.
- 51 X. Ma, J. Wang, J. Gao, Z. Hu, C. Xu, X. Zhang and F. Zhang, *Adv. Energy Mater.*, 2020, **10**, 2001404.
- 52 T. Zhang, C. An, P. Bi, Q. Lv, J. Qin, L. Hong, Y. Cui, S. Zhang and J. Hou, *Adv. Energy Mater.*, 2021, **11**, 2101705.
- 53 A. Zeng, X. Ma, M. Pan, Y. Chen, R. Ma, H. Zhao, J. Zhang, H. K. Kim, A. Shang, S. Luo, I. C. Angunawela, Y. Chang, Z. Qi, H. Sun, J. Y. L. Lai, H. Ade, W. Ma, F. Zhang and H. Yan, *Adv. Funct. Mater.*, 2021, **31**, 2102413.
- 54 X. Ma, A. Zeng, J. Gao, Z. Hu, C. Xu, J. H. Son, S. Y. Jeong, C. Zhang, M. Li, K. Wang, H. Yan, Z. Ma, Y. Wang, H. Y. Woo and F. Zhang, *Natl. Sci. Rev.*, 2021, **8**, nwaa305.
- 55 B. Fan, W. Gao, Y. Wang, W. Zhong, F. Lin, W. J. Li, F. Huang, K.-M. Yu and A. K. Y. Jen, *ACS Energy Lett.*, 2021, **6**, 3522-3529.
- 56 Y. Chang, J. Zhang, Y. Chen, G. Chai, X. Xu, L. Yu, R. Ma, H. Yu, T. Liu, P. Liu, Q. Peng and H. Yan, *Adv. Energy Mater.*, 2021, **11**, 2100079.
- 57 Y. Chen, F. Bai, Z. Peng, L. Zhu, J. Zhang, X. Zou, Y. Qin, H. K. Kim, J. Yuan, L.-K. Ma, J. Zhang, H. Yu, P. C. Y. Chow, F. Huang, Y. Zou, H. Ade, F. Liu and H. Yan, *Adv. Energy Mater.*, 2021, **11**, 2003141.
- 58 S. Bao, H. Yang, H. Fan, J. Zhang, Z. Wei, C. Cui and Y. Li, *Adv. Mater.*, 2021, **33**, 2105301.
- 59 Y. Cai, Y. Li, R. Wang, H. Wu, Z. Chen, J. Zhang, Z. Ma, X. Hao, Y. Zhao, C. Zhang, F. Huang and Y. Sun, *Adv. Mater.*, 2021, **33**, 2101733.
- 60 Y. Cui, Y. Xu, H. Yao, P. Bi, L. Hong, J. Zhang, Y. Zu, T. Zhang, J. Qin, J. Ren, Z. Chen, C. He, X. Hao, Z. Wei and J. Hou, *Adv. Mater.*, 2021, **33**, 2102420.
- 61 Y. Xu, Y. Cui, H. Yao, T. Zhang, J. Zhang, L. Ma, J. Wang, Z. Wei and J. Hou, *Adv. Mater.*, 2021, **33**, 2101090.
- 62 L. Zhan, S. Li, X. Xia, Y. Li, X. Lu, L. Zuo, M. Shi and H. Chen, *Adv. Mater.*, 2021, **33**, 2007231.
- 63 Y. Zhang, G. Cai, Y. Li, Z. Zhang, T. Li, X. Zuo, X. Lu and Y. Lin, *Adv. Mater.*, 2021, **33**,

2008134.

- 64 Y. Li, Y. Cai, Y. Xie, J. Song, H. Wu, Z. Tang, J. Zhang, F. Huang and Y. Sun, *Energy Environ. Sci.*, 2021, **14**, 5009-5016.
- 65 J. Qin, Z. Chen, P. Bi, Y. Yang, J. Zhang, Z. Huang, Z. Wei, C. An, H. Yao, X. Hao, T. Zhang, Y. Cui, L. Hong, C. Liu, Y. Zu, C. He and J. Hou, *Energy Environ. Sci.*, 2021, **14**, 5903-5910.
- 66 P. Bi, S. Zhang, Z. Chen, Y. Xu, Y. Cui, T. Zhang, J. Ren, J. Qin, L. Hong, X. Hao and J. Hou, *Joule*, 2021, **5**, 2408-2419.
- 67 Z. Chen, W. Song, K. Yu, J. Ge, J. Zhang, L. Xie, R. Peng and Z. Ge, *Joule*, 2021, **5**, 2395-2407.
- 68 R. Sun, W. Wang, H. Yu, Z. Chen, X. Xia, H. Shen, J. Guo, M. Shi, Y. Zheng, Y. Wu, W. Yang, T. Wang, Q. Wu, Y. Yang, X. Lu, J. Xia, C. J. Brabec, H. Yan, Y. Li and J. Min, *Joule*, 2021, **5**, 1548-1565.
- 69 G. Zhang, H. Ning, H. Chen, Q. Jiang, J. Jiang, P. Han, L. Dang, M. Xu, M. Shao, F. He and Q. Wu, *Joule*, 2021, **5**, 931-944.
